# Supplementary material for: Theoretical investigation on the interaction between RhIII octaethylporphyrin and a graphite basal surface: a comparison study of DFT, DFT-D, and AFM
Source: Royal Society of Chemistry journal article supplement (doi:10.1039/c8cp02923g), 2018-01-01
Supplement: c8cp02923g1.pdf [file c8cp02923g1.pdf]

Supplementary Information for

“Theoretical investigation on the interaction between Rh<sup>III</sup> octaethylporphyrin and a graphite basal surface: A comparison study of DFT, DFT-D, and AFM”

Kohei Tada<sup>a\*</sup>, Yasushi Maeda<sup>a</sup>, Hiroyuki Ozaki<sup>a</sup>, Shingo Tanaka<sup>a</sup>, Shin-ichi Yamazaki<sup>a</sup>

<sup>a</sup> *Research Institute of Electrochemical Energy, National Institute of Advanced Industrial Science and Technology (AIST), 1-8-31, Midorigaoka, Ikeda, Osaka 563-8577, Japan*

\*Corresponding author

Phone: +81-72-751-8566

Fax: +81-72-751-9714

E-mail address: k-tada@aist.go.jp

## Contents

|                                                                                                                                                       |             |
|-------------------------------------------------------------------------------------------------------------------------------------------------------|-------------|
| Results of benchmark calculations for Rh atom, Rh cations ( $\text{Rh}^+$ , $\text{Rh}^{2+}$ , and $\text{Rh}^{3+}$ ), and Rh anion ( $\text{Rh}^-$ ) | pp. 3 – 6   |
| Results of benchmark calculations for $[\text{RhCO}]^x$ ( $x = +1, 0$ , and $-1$ ) molecules                                                          | pp. 7 – 12  |
| Adsorption energy of CO adsorption onto $[\text{Rh}^{\text{III}}(\text{OEP})(\text{Cl})]$ complex with and without correction of BSSE                 | pp. 13      |
| Comparison of the results obtained by atom-centered and plane-wave basis sets                                                                         | pp. 14 – 16 |
| Results for the adsorption of $[\text{Rh}^{\text{III}}(\text{OEP})(\text{Cl})]$ onto a two-layer graphite slab model                                  | pp. 17      |
| Results for the $[\text{Rh}^{\text{III}}(\text{OEP})(\text{Cl})]$ /graphite system obtained by DFT-D3 method                                          | pp. 18      |
| Results for the adsorption energies of the $[\text{Rh}^{\text{III}}(\text{OEP})(\text{Cl})]$ /graphite basal surface system                           | pp. 19 – 24 |
| Results for height profiles of molecular layers on HOPG observed by AFM                                                                               | pp. 25      |
| Results for the frontier orbitals of the $[\text{Rh}^{\text{III}}(\text{OEP})(\text{Cl})]$ /graphite basal surface system                             | pp. 26 – 32 |
| References for supplementary information                                                                                                              | pp. 33 – 35 |

## Results of benchmark calculations for Rh atom, Rh cations ( $\text{Rh}^+$ , $\text{Rh}^{2+}$ , and $\text{Rh}^{3+}$ ), and Rh anion ( $\text{Rh}^-$ )

Computational costs of high-accuracy first principles methods, such as post-HF and multi-reference methods [S1], are high; therefore, they can be only adopted for calculations of systems characterized by small numbers of atoms, and we cannot use these methods to perform calculations on metalloporphyrins. On the other hand, computational costs of DFT-based calculations [S2] are comparatively lower than the high-accuracy methods. However, results of DFT-based calculations often dependent on the selection of the exchange-correlation functional and basis set, and the results sometimes do not, even qualitatively, agree with the experimental data. Hence, the dependencies of the exchange-correlation functional and basis set should be investigated in detail.

We performed benchmark calculations for the ionization energies (first, second, and third) and electron affinity of the Rh atom. Nine exchange-correlation functionals were considered, namely, BLYP [S3], PBE/PBE [S4], B3LYP [S5], B3PW91 [S6], PBE0 [S7], M05 [S8], M06 [S9], CAM-B3LYP [S10], and LC- $\omega$ PBE [S11]. Five basis sets were considered for the Rh atom, namely, SDD [S12], LANL2DZ [S13], LANL08(f) [S14], LANL2DZ+1d1f [S15], LANL-[10s8p7d3f2g] [S15]. Serial numbers for the combination of exchange-correlation functionals and basis sets are summarized in Table S1. For reference to high-accuracy calculations, coupled-cluster singlet and doublet with a triplet contribution (CCSD(T)) [S16] calculations with the LANL-[10s8p7d3f2g] basis set were carried out. The calculation results were compared with experimental results [S17]. The calculations were performed using the Gaussian 09 program package [S18].

The calculation results are summarized in Fig. S1 and Tables S2–S4. Fig. S1 shows all calculation results. Tables S2 and S3 show the results obtained for the first ionization energy and electron affinity by DFT calculations characterized by values close to the experimental results, respectively. Table S4 shows the summation of the second and third ionization energy by DFT calculations characterized by values close to the experimental results.

As observed, the effect of the selection of different exchange-correlation functionals and basis sets on the first, second, third ionization energies and electron affinity of Rh is very small.

When investigating the electro-oxidation of CO by Rh porphyrin complexes, the redox potential of  $\text{Rh}^{\text{III}} \rightleftharpoons \text{Rh}^{\text{I}}$  is a crucial factor to consider, since CO oxidation is a two-electron oxidation. Here, the redox potential corresponds to the summation of the second and third ionization energies, which are summarized in Table S4. The results in Table S4 showed that PBE-based functionals are a better choice than other functionals for estimating the redox potential.

Table S1. Serial numbers of the combination of exchange-correlation functionals and basis sets for the benchmark calculation of ionization energy and electron affinity of Rh atom.

| Serial number | Exchange-correlation functional | Basis set          | Serial number | Exchange-correlation functional | Basis set          |
|---------------|---------------------------------|--------------------|---------------|---------------------------------|--------------------|
| 1             | BLYP                            | SDD                | 26            | M05                             | SDD                |
| 2             | BLYP                            | LANL2DZ            | 27            | M05                             | LANL2DZ            |
| 3             | BLYP                            | LANL08(f)          | 28            | M05                             | LANL08(f)          |
| 4             | BLYP                            | LANL2DZ+1d1f       | 29            | M05                             | LANL2DZ+1d1f       |
| 5             | BLYP                            | LANL-[10s8p7d3f2g] | 30            | M05                             | LANL-[10s8p7d3f2g] |
| 6             | PBEPBE                          | SDD                | 31            | M06                             | SDD                |
| 7             | PBEPBE                          | LANL2DZ            | 32            | M06                             | LANL2DZ            |
| 8             | PBEPBE                          | LANL08(f)          | 33            | M06                             | LANL08(f)          |
| 9             | PBEPBE                          | LANL2DZ+1d1f       | 34            | M06                             | LANL2DZ+1d1f       |
| 10            | PBEPBE                          | LANL-[10s8p7d3f2g] | 35            | M06                             | LANL-[10s8p7d3f2g] |
| 11            | B3LYP                           | SDD                | 36            | CAM-B3LYP                       | SDD                |
| 12            | B3LYP                           | LANL2DZ            | 37            | CAM-B3LYP                       | LANL2DZ            |
| 13            | B3LYP                           | LANL08(f)          | 38            | CAM-B3LYP                       | LANL08(f)          |
| 14            | B3LYP                           | LANL2DZ+1d1f       | 39            | CAM-B3LYP                       | LANL2DZ+1d1f       |
| 15            | B3LYP                           | LANL-[10s8p7d3f2g] | 40            | CAM-B3LYP                       | LANL-[10s8p7d3f2g] |
| 16            | B3PW91                          | SDD                | 41            | LC- $\omega$ PBE                | SDD                |
| 17            | B3PW91                          | LANL2DZ            | 42            | LC- $\omega$ PBE                | LANL2DZ            |
| 18            | B3PW91                          | LANL08(f)          | 43            | LC- $\omega$ PBE                | LANL08(f)          |
| 19            | B3PW91                          | LANL2DZ+1d1f       | 44            | LC- $\omega$ PBE                | LANL2DZ+1d1f       |
| 20            | B3PW91                          | LANL-[10s8p7d3f2g] | 45            | LC- $\omega$ PBE                | LANL-[10s8p7d3f2g] |
| 21            | PBE0                            | SDD                |               |                                 |                    |
| 22            | PBE0                            | LANL2DZ            |               |                                 |                    |
| 23            | PBE0                            | LANL08(f)          |               |                                 |                    |
| 24            | PBE0                            | LANL2DZ+1d1f       |               |                                 |                    |
| 25            | PBE0                            | LANL-[10s8p7d3f2g] |               |                                 |                    |

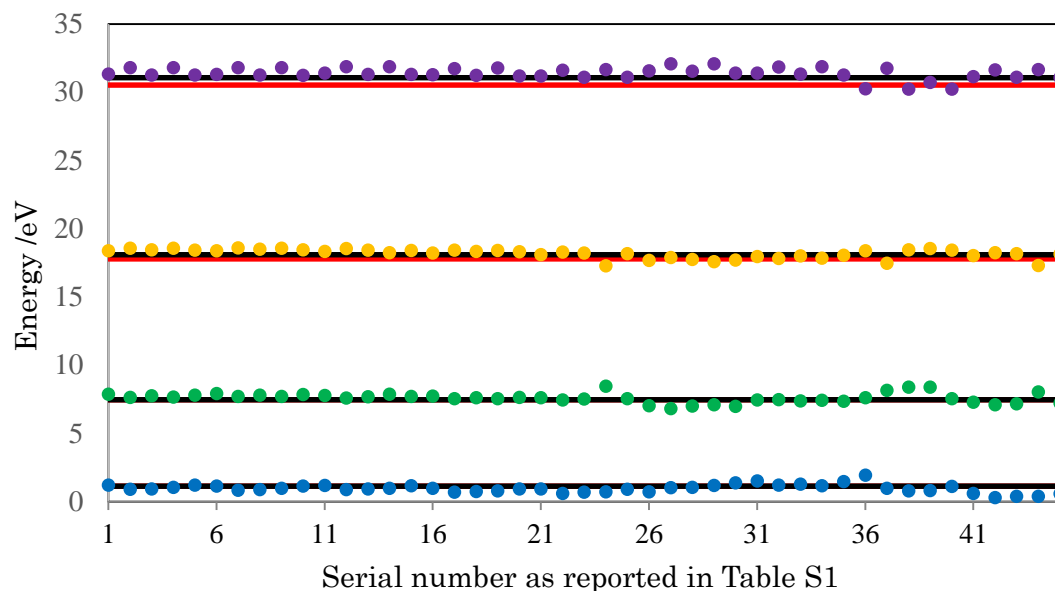

Fig. S1. First (green dots), second (yellow dots), and third (purple dots) ionization energies and electron affinity (blue dots) of Rh atom as estimated by DFT calculations. Black lines represent the values of experimental data and red lines indicate the values obtained by CCSD(T) calculations.

Table S2. First ionization energies estimated by DFT calculations characterized by values close to experimental data.

| Ranking                     | Exchange-correlation functional | Basis set          | Estimated value /eV | Deviation from the experimental value |
|-----------------------------|---------------------------------|--------------------|---------------------|---------------------------------------|
| 1                           | M06                             | LANL2DZ            | 7.47                | 0 %                                   |
| 2                           | M06                             | SDD                | 7.46                | 0 %                                   |
| 3                           | PBE0                            | LANL2DZ            | 7.44                | 0 %                                   |
| 4                           | PBE0                            | LANL08(f)          | 7.51                | 1 %                                   |
| 4                           | M06                             | LANL2DZ+1d1f       | 7.43                | 1 %                                   |
| 6                           | B3PW91                          | LANL2DZ            | 7.54                | 1 %                                   |
| 6                           | B3PW91                          | LANL2DZ+1d1f       | 7.54                | 1 %                                   |
| 6                           | PBE0                            | LANL-[10s8p7d3f2g] | 7.54                | 1 %                                   |
| Experimental value          |                                 |                    | 7.47                | 0 %                                   |
| Estimation value by CCSD(T) |                                 |                    | 7.47                | 0 %                                   |

Table S3. First electron affinities estimated by DFT calculations characterized by values close to experimental data.

| Ranking                     | Exchange-correlation<br>functional | Basis set          | Estimated value<br>/eV | Deviation from the<br>experimental value |
|-----------------------------|------------------------------------|--------------------|------------------------|------------------------------------------|
| 1                           | PBEPBE                             | LANL-[10s8p7d3f2g] | 1.13                   | 0 %                                      |
| 2                           | PBEPBE                             | SDD                | 1.15                   | 2 %                                      |
| 2                           | CAM-B3LYP                          | LANL-[10s8p7d3f2g] | 1.11                   | 2 %                                      |
| 4                           | B3LYP                              | LANL-[10s8p7d3f2g] | 1.16                   | 3 %                                      |
| 5                           | M06                                | LANL2DZ+1d1f       | 1.17                   | 4 %                                      |
| Experimental value          |                                    |                    | 1.13                   | 0 %                                      |
| Estimation value by CCSD(T) |                                    |                    | 1.12                   | 1 %                                      |

Table S4. Summation of the second (IE2) and third (IE3) ionization energies estimated by DFT calculations characterized by values close to experimental data.

| Ranking                     | Exchange-correlation<br>functional | Basis set          | IE2<br>/eV | IE3<br>/eV | Sum<br>/eV | Deviation<br>from the<br>experimental<br>value |
|-----------------------------|------------------------------------|--------------------|------------|------------|------------|------------------------------------------------|
| 1                           | LC- $\omega$ PBE                   | LANL-[10s8p7d3f2g] | 18.14      | 31.08      | 49.22      | 0 %                                            |
| 2                           | PBE0                               | SDD                | 18.10      | 31.18      | 49.28      | 0 %                                            |
| 3                           | PBE0                               | LANL08(f)          | 18.17      | 31.09      | 49.26      | 1 %                                            |
| 4                           | LC- $\omega$ PBE                   | SDD                | 18.04      | 31.15      | 49.19      | 1 %                                            |
| 5                           | PBE0                               | LANL-[10s8p7d3f2g] | 18.18      | 31.10      | 49.28      | 1 %                                            |
| 6                           | PBE0                               | LANL08(f)          | 18.22      | 31.09      | 49.31      | 1 %                                            |
| 7                           | M06                                | LANL-[10s8p7d3f2g] | 18.05      | 31.25      | 49.30      | 1 %                                            |
| 8                           | M06                                | LANL08(f)          | 18.01      | 31.34      | 49.35      | 1 %                                            |
| Experimental value          |                                    |                    | 18.08      | 31.06      | 49.14      | 0 %                                            |
| Estimation value by CCSD(T) |                                    |                    | 17.78      | 30.52      | 48.30      | 3 %                                            |

## Results of benchmark calculations for $[\text{RhCO}]^x$ ( $x = +1, 0,$ and $-1$ ) molecules

Benchmark calculations for CO-coordinated Rh molecules ( $[\text{RhCO}]^+$ ,  $[\text{Rh}(\text{CO})]$ , and  $[\text{RhCO}]^-$ ) were performed to investigate the exchange-correlation functional and basis set dependencies. The basis sets considered for C and O atoms were 6-31G(d) [S19], cc-pVDZ [S20], 6-31+G(d) [S19], aug-cc-pVDZ [S20], 6-311G(d) [S19], cc-pVTZ [S20], 6-311+G(d) [S19], aug-cc-pVTZ [S20], cc-pVQZ [S20], aug-cc-pVQZ [S20], cc-pV5Z [S20], aug-cc-pV5Z [S20], cc-pV6Z [S20], and aug-cc-pV6Z [S20]. Exchange-correlation functionals and basis sets for Rh that show comparatively better results for Rh ionization energies and electron affinity were considered. Serial numbers for combinations of exchange-correlation functionals and basis sets are reported in Table S5. The Gaussian 09 program package was used for the benchmark calculations.

We analyzed the benchmark results for the distance between Rh and C (Fig. S2), distance between C and O (Fig. S3), the vibrational frequency of the Rh–C bond (Fig. S4), vibrational frequency of the C–O bond (Fig. S5), the energy difference among the total energies of  $[\text{RhCO}]^x$  molecules (Fig. S6), and the CO adsorption energy (Fig. S7), estimated as  $E([\text{RhCO}]^x) - E(\text{Rh}^x) - E(\text{CO})$ . All the structures of the molecules were optimized by all the considered methods, and vibration frequency analysis was performed for all the optimized structures.

Figure S2 shows that there is no qualitative dependence of the distance between Rh and C in  $[\text{RhCO}]^x$  molecules on the DFT computational method, except for the results of serial numbers 7 and 17, which are the results obtained by the M06 functional. The reason why the results of serial number 7 and 17 are different from that obtained with other functionals can be understood observing the results of the vibrational frequency of the Rh–C bond shown in Fig. S4. The vibrational frequencies of  $[\text{RhCO}]^+$  estimated using the methods of serial numbers 7 and 17 are imaginary, so the results could not be shown in Fig. S4. In other words, the methods optimized the geometry of  $[\text{RhCO}]^+$  to transition states (they will be artificial states) of CO adsorption onto  $\text{Rh}^+$ . This occurred because we did not calculate the frequencies of all sequential structures during geometry optimization, in order to lower the computational cost. Except for the results of serial number 7 and 17, the results shown in Fig. S4 (the vibrational frequency of Rh–C bond) are qualitatively the same.

As reported in Fig. S3, there is no dependency of the C–O bond distance on the calculation methods. Hence, there is little dependence of the method on the vibrational frequency of the C–O bond (Fig. S5), and the results agree with the experimental data [S15].

The estimated energy differences among the total energies of  $[\text{RhCO}]^x$  molecules are qualitatively not affected by the computational method (Fig. S6). Additionally, as the results in Fig. S7 show, the orders of magnitude of the CO adsorption energies of  $\text{Rh}^x$  species as estimated by DFT calculations are the same, and the order of magnitude is identical to that obtained by CCSD(T) with LANL- [10s8p7d3f2g] (for Rh) and aug-cc-pVQZ (for C and O) basis sets. However, as the results obtained by M06 functional show, e.g. serial numbers 5–8, the differences between CO adsorption energy onto Rh and  $\text{Rh}^-$  respectively are very small, and differences in the results with respect to other functionals or CCSD(T) calculations can be observed. Hence, the M06 functional may be unsuitable for calculation on molecular complexes including the Rh–CO coordination bond.

In summary, the benchmark calculations demonstrate that the dependence of the calculation results of

Rh-CO molecular complexes on the DFT calculation method employed is relatively small; especially, the basis set dependency is very small.

Table S5. Serial numbers of the combinations of exchange-correlation functionals and basis sets for the benchmark calculation of  $[\text{RhCO}]^x$  ( $x = +1, 0, \text{ and } -1$ ) molecules.

| Serial number | Exchange-correlation functional | Basis set for Rh   | Basis set for C | Basis set for O |
|---------------|---------------------------------|--------------------|-----------------|-----------------|
| 1             | PBE0                            | SDD                | 6-31+G*         | 6-31+G*         |
| 2             | PBE0                            | SDD                | 6-31G*          | 6-31+G*         |
| 3             | PBE0                            | SDD                | aug-cc-pVDZ     | aug-cc-pVDZ     |
| 4             | PBE0                            | SDD                | cc-pVDZ         | aug-cc-pVDZ     |
| 5             | M06                             | SDD                | 6-31+G*         | 6-31+G*         |
| 6             | M06                             | SDD                | 6-31G*          | 6-31+G*         |
| 7             | M06                             | SDD                | aug-cc-pVDZ     | aug-cc-pVDZ     |
| 8             | M06                             | SDD                | cc-pVDZ         | aug-cc-pVDZ     |
| 9             | PBE0                            | LANL2DZ            | 6-31+G*         | 6-31+G*         |
| 10            | PBE0                            | LANL2DZ            | 6-31G*          | 6-31+G*         |
| 11            | PBE0                            | LANL2DZ            | aug-cc-pVDZ     | aug-cc-pVDZ     |
| 12            | PBE0                            | LANL2DZ            | cc-pVDZ         | aug-cc-pVDZ     |
| 13            | M06                             | LANL2DZ            | 6-31+G*         | 6-31+G*         |
| 14            | M06                             | LANL2DZ            | 6-31G*          | 6-31+G*         |
| 15            | M06                             | LANL2DZ            | aug-cc-pVDZ     | aug-cc-pVDZ     |
| 16            | M06                             | LANL2DZ            | cc-pVDZ         | aug-cc-pVDZ     |
| 17            | PBEPBE                          | LANL-[10s8p7d3f2g] | aug-cc-pVQZ     | aug-cc-pVQZ     |
| 18            | PBEPBE                          | LANL-[10s8p7d3f2g] | cc-pVQZ         | aug-cc-pVQZ     |
| 19            | PBEPBE                          | LANL-[10s8p7d3f2g] | aug-cc-pV5Z     | aug-cc-pV5Z     |
| 20            | PBEPBE                          | LANL-[10s8p7d3f2g] | cc-pV5Z         | aug-cc-pV5Z     |
| 21            | PBEPBE                          | LANL-[10s8p7d3f2g] | aug-cc-pV6Z     | aug-cc-pV6Z     |
| 22            | PBEPBE                          | LANL-[10s8p7d3f2g] | cc-pV6Z         | aug-cc-pV6Z     |
| 23            | CAM-B3LYP                       | LANL-[10s8p7d3f2g] | aug-cc-pVQZ     | aug-cc-pVQZ     |
| 24            | CAM-B3LYP                       | LANL-[10s8p7d3f2g] | cc-pVQZ         | aug-cc-pVQZ     |
| 25            | CAM-B3LYP                       | LANL-[10s8p7d3f2g] | aug-cc-pV5Z     | aug-cc-pV5Z     |
| 26            | CAM-B3LYP                       | LANL-[10s8p7d3f2g] | cc-pV5Z         | aug-cc-pV5Z     |
| 27            | CAM-B3LYP                       | LANL-[10s8p7d3f2g] | aug-cc-pV6Z     | aug-cc-pV6Z     |
| 28            | CAM-B3LYP                       | LANL-[10s8p7d3f2g] | cc-pV6Z         | aug-cc-pV6Z     |
| 29            | LC- $\omega$ PBE                | LANL-[10s8p7d3f2g] | aug-cc-pVQZ     | aug-cc-pVQZ     |
| 30            | LC- $\omega$ PBE                | LANL-[10s8p7d3f2g] | cc-pVQZ         | aug-cc-pVQZ     |
| 31            | LC- $\omega$ PBE                | LANL-[10s8p7d3f2g] | aug-cc-pV5Z     | aug-cc-pV5Z     |
| 32            | LC- $\omega$ PBE                | LANL-[10s8p7d3f2g] | cc-pV5Z         | aug-cc-pV5Z     |
| 33            | LC- $\omega$ PBE                | LANL-[10s8p7d3f2g] | aug-cc-pV6Z     | aug-cc-pV6Z     |



|    |                  |                    |             |             |
|----|------------------|--------------------|-------------|-------------|
| 34 | LC- $\omega$ PBE | LANL-[10s8p7d3f2g] | cc-pV6Z     | aug-cc-pV6Z |
| 35 | PBEPBE           | SDD                | 6-31+G*     | 6-31+G*     |
| 36 | PBEPBE           | SDD                | 6-31G*      | 6-31+G*     |
| 37 | PBEPBE           | SDD                | aug-cc-pVDZ | aug-cc-pVDZ |
| 38 | PBEPBE           | SDD                | cc-pVDZ     | aug-cc-pVDZ |
| 39 | B3PW91           | LANL2DZ            | 6-31+G*     | 6-31+G*     |
| 40 | B3PW91           | LANL2DZ            | 6-31G*      | 6-31+G*     |
| 41 | B3PW91           | LANL2DZ            | aug-cc-pVDZ | aug-cc-pVDZ |
| 42 | B3PW91           | LANL2DZ            | cc-pVDZ     | aug-cc-pVDZ |
| 43 | B3PW91           | LANL2DZ+1d1f       | 6-311+G*    | 6-311+G*    |
| 44 | B3PW91           | LANL2DZ+1d1f       | 6-311G*     | 6-311+G*    |
| 45 | B3PW91           | LANL2DZ+1d1f       | aug-cc-pVTZ | aug-cc-pVTZ |
| 46 | B3PW91           | LANL2DZ+1d1f       | cc-pVTZ     | aug-cc-pVTZ |
| 47 | M06              | LANL2DZ+1d1f       | 6-311+G*    | 6-311+G*    |
| 48 | M06              | LANL2DZ+1d1f       | 6-311G*     | 6-311+G*    |
| 49 | M06              | LANL2DZ+1d1f       | aug-cc-pVTZ | aug-cc-pVTZ |
| 50 | M06              | LANL2DZ+1d1f       | cc-pVTZ     | aug-cc-pVTZ |
| 51 | PBE0             | LANL08(f)          | 6-311+G*    | 6-311+G*    |
| 52 | PBE0             | LANL08(f)          | 6-311G*     | 6-311+G*    |
| 53 | PBE0             | LANL08(f)          | aug-cc-pVTZ | aug-cc-pVTZ |
| 54 | PBE0             | LANL08(f)          | cc-pVTZ     | aug-cc-pVTZ |
| 55 | M06              | LANL08(f)          | 6-311+G*    | 6-311+G*    |
| 56 | M06              | LANL08(f)          | 6-311G*     | 6-311+G*    |
| 57 | M06              | LANL08(f)          | aug-cc-pVTZ | aug-cc-pVTZ |
| 58 | M06              | LANL08(f)          | cc-pVTZ     | aug-cc-pVTZ |
| 59 | LC- $\omega$ PBE | LANL08(f)          | 6-311+G*    | 6-311+G*    |
| 60 | LC- $\omega$ PBE | LANL08(f)          | 6-311G*     | 6-311+G*    |
| 61 | LC- $\omega$ PBE | LANL08(f)          | aug-cc-pVTZ | aug-cc-pVTZ |
| 62 | LC- $\omega$ PBE | LANL08(f)          | cc-pVTZ     | aug-cc-pVTZ |
| 63 | B3LYP            | LANL-[10s8p7d3f2g] | aug-cc-pVQZ | aug-cc-pVQZ |
| 64 | B3LYP            | LANL-[10s8p7d3f2g] | cc-pVQZ     | aug-cc-pVQZ |
| 65 | B3LYP            | LANL-[10s8p7d3f2g] | aug-cc-pV5Z | aug-cc-pV5Z |
| 66 | B3LYP            | LANL-[10s8p7d3f2g] | cc-pV5Z     | aug-cc-pV5Z |
| 67 | B3LYP            | LANL-[10s8p7d3f2g] | aug-cc-pV6Z | aug-cc-pV6Z |
| 68 | B3LYP            | LANL-[10s8p7d3f2g] | cc-pV6Z     | aug-cc-pV6Z |
| 69 | PBE0             | LANL-[10s8p7d3f2g] | aug-cc-pVQZ | aug-cc-pVQZ |
| 70 | PBE0             | LANL-[10s8p7d3f2g] | cc-pVQZ     | aug-cc-pVQZ |
| 71 | PBE0             | LANL-[10s8p7d3f2g] | aug-cc-pV5Z | aug-cc-pV5Z |
| 72 | PBE0             | LANL-[10s8p7d3f2g] | cc-pV5Z     | aug-cc-pV5Z |

|    |                  |                    |             |             |
|----|------------------|--------------------|-------------|-------------|
| 73 | PBE0             | LANL-[10s8p7d3f2g] | aug-cc-pV6Z | aug-cc-pV6Z |
| 74 | PBE0             | LANL-[10s8p7d3f2g] | cc-pV6Z     | aug-cc-pV6Z |
| 75 | M06              | LANL-[10s8p7d3f2g] | aug-cc-pVQZ | aug-cc-pVQZ |
| 76 | M06              | LANL-[10s8p7d3f2g] | cc-pVQZ     | aug-cc-pVQZ |
| 77 | M06              | LANL-[10s8p7d3f2g] | aug-cc-pV5Z | aug-cc-pV5Z |
| 78 | M06              | LANL-[10s8p7d3f2g] | cc-pV5Z     | aug-cc-pV5Z |
| 79 | M06              | LANL-[10s8p7d3f2g] | aug-cc-pV6Z | aug-cc-pV6Z |
| 80 | M06              | LANL-[10s8p7d3f2g] | cc-pV6Z     | aug-cc-pV6Z |
| 81 | LC- $\omega$ PBE | SDD                | 6-31+G*     | 6-31+G*     |
| 82 | LC- $\omega$ PBE | SDD                | 6-31G*      | 6-31+G*     |
| 83 | LC- $\omega$ PBE | SDD                | aug-cc-pVDZ | aug-cc-pVDZ |
| 84 | LC- $\omega$ PBE | SDD                | cc-pVDZ     | aug-cc-pVDZ |

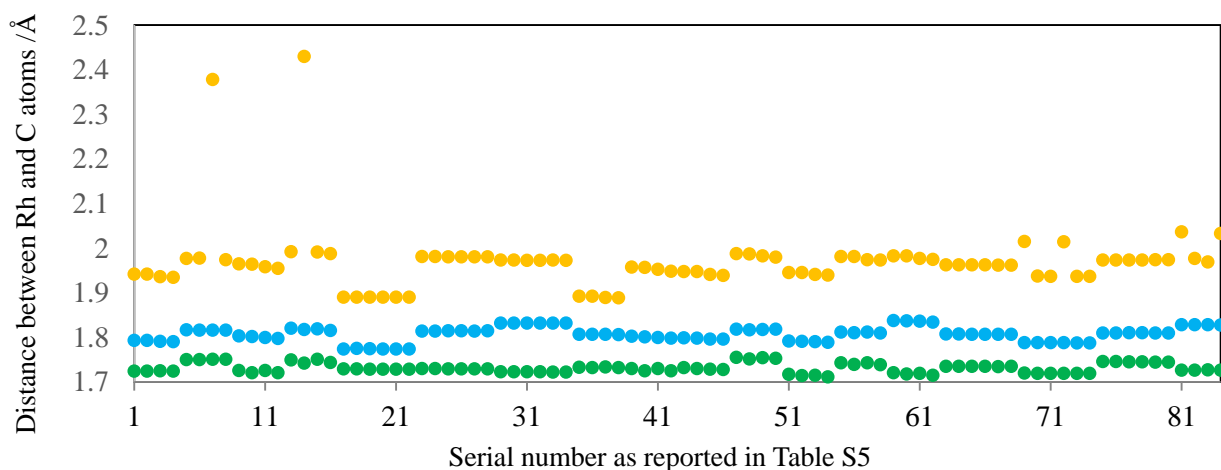

Fig. S2. Distance between Rh and C atoms in  $[\text{RhCO}]^+$  (yellow dots),  $[\text{RhCO}]$  (blue dots), and  $[\text{RhCO}]^-$  (green dots) molecules as obtained from DFT calculations.

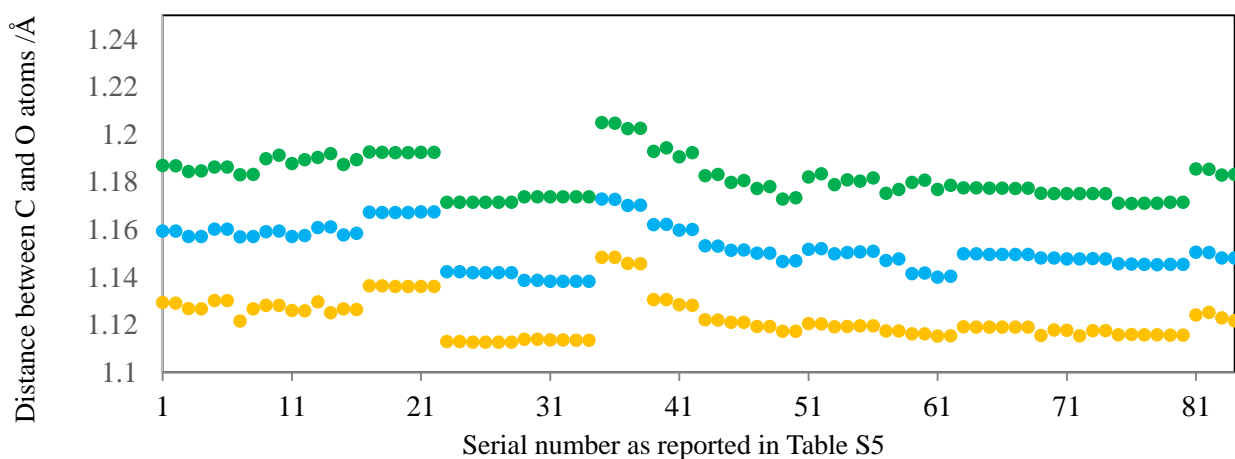

Fig. S3. Distance between C and O atoms in  $[\text{RhCO}]^+$  (yellow dots),  $[\text{RhCO}]$  (blue dots), and  $[\text{RhCO}]^-$  (green dots) molecules as obtained from DFT calculations.

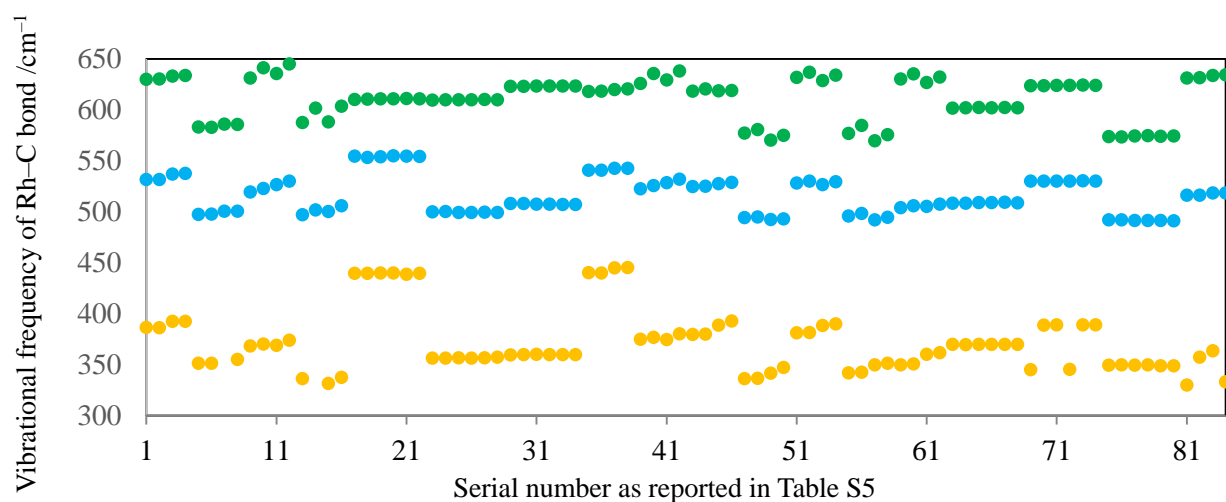

Fig. S4. Vibrational frequency of the Rh-C bond in  $[\text{RhCO}]^+$  (yellow dots),  $[\text{RhCO}]$  (blue dots), and  $[\text{RhCO}]^-$  (green dots) molecules as estimated by DFT calculations.

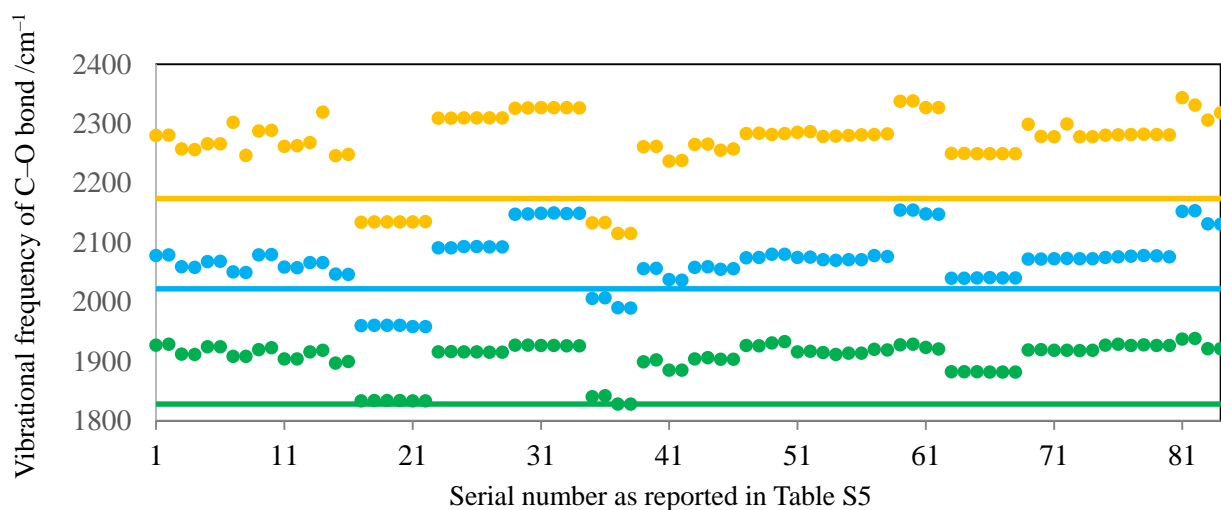

Fig. S5. Vibrational frequency of the C-O bond in  $[\text{RhCO}]^+$  (yellow dots),  $[\text{RhCO}]$  (blue dots), and  $[\text{RhCO}]^-$  (green dots) molecules as estimated by DFT calculations. The yellow, blue, and green lines represent the experimental results for  $[\text{RhCO}]^+$ ,  $[\text{RhCO}]$ , and  $[\text{RhCO}]^-$ , respectively.

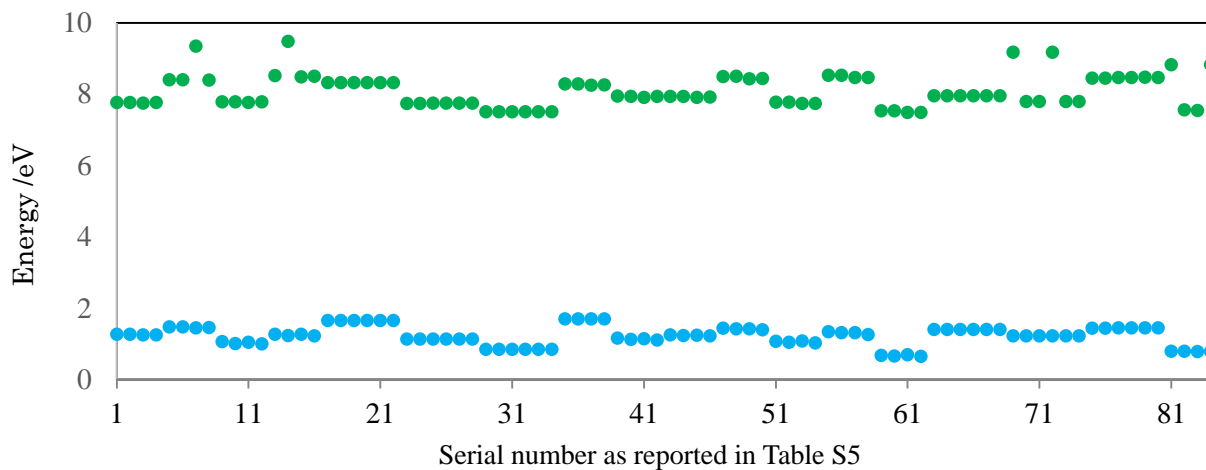

Fig. S6. Ionization energies (green dots) and electron affinities (blue dots) of the [RhCO] molecule as estimated by DFT calculations.

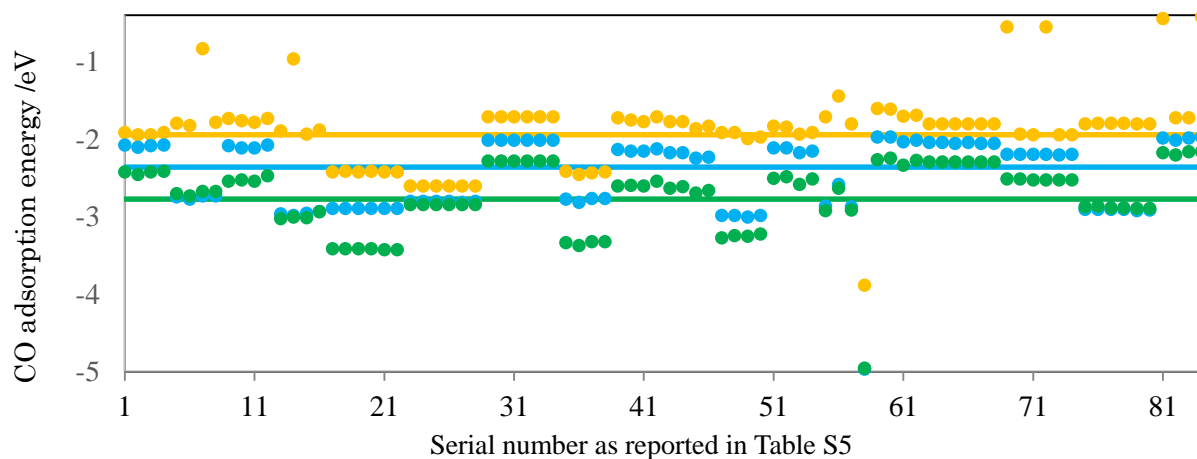

Fig. S7. CO adsorption energies of Rh<sup>+</sup> (yellow dots), Rh (blue dots), and Rh<sup>-</sup> (green dots) as estimated by DFT calculations. The yellow, blue, and green lines represent the CCSD(T) calculation results for Rh<sup>+</sup>, Rh, and Rh<sup>-</sup>, respectively.

## Adsorption energy of CO adsorption onto $[\text{Rh}^{\text{III}}(\text{OEP})(\text{Cl})]$ complex with and without correction of BSSE

When different basis sets are used for different atoms, basis set superposition error (BSSE) occurs. BSSE is the error incurred when stabilization caused by the interaction between two (or more) molecules (atoms) is overestimated because one molecule uses the basis function of the other molecules to provide basis set flexibility of the molecule. Hence, the adsorption energy is generally overestimated when BSSE is not corrected. The effects of BSSE on the adsorption energy are usually discussed using a counterpoise scheme, which is a correction scheme for BSSE [S21].

We estimated the adsorption energies of CO adsorption onto  $[\text{Rh}^{\text{III}}(\text{OEP})(\text{Cl})]$  with and without a correction of BSSE using a counterpoise (CP) scheme. Owing to computational cost, it is hard to carry out geometry optimization with the CP method; therefore, the CO adsorption energies were estimated using the structure obtained by the calculations without the BSSE correction. For the CP scheme,  $[\text{Rh}^{\text{III}}(\text{OEP})(\text{CO})(\text{Cl})]$  was separated into three fragments:  $[\text{Rh}^{\text{III}}(\text{OEP})]^+$ , CO, and  $\text{Cl}^-$ . Similarly, the  $[\text{Rh}^{\text{III}}(\text{OEP})(\text{Cl})]$  was separated into two fragments:  $[\text{Rh}^{\text{III}}(\text{OEP})]^+$  and  $\text{Cl}^-$ .

The estimated adsorption energies with and without the correction were  $-1.17$  eV and  $-1.29$  eV, respectively. It was confirmed that a BSSE of 0.12 eV was included in CO adsorption energy. However, we did not discuss the CO adsorption energy in the main text, and the results and discussion were not affected.

## Comparison of the results obtained by atom-centered and plane-wave basis sets

In the main text, we used two different computational approaches, an atom-centered basis set (Section 3.1) and plane-wave basis set (Section 3.2), using two major software packages (Gaussian09 [S18] and VASP [S22]). This is not a common practice. Therefore, we should perform a comparison of the results for the  $[\text{Rh}^{\text{III}}(\text{OEP})(\text{Cl})]$  complex using the two approaches (programs).

Figures S8 shows the geometries of the  $[\text{Rh}^{\text{III}}(\text{OEP})(\text{Cl})]$  complex optimized using a hybrid-DFT exchange-correlational functional, PBE0 [S7], with an atom-centered basis using the Gaussian09 program package. Basis sets for Rh, C and others were SDD [S12], 6-31G(d) [S19], and 6-31+G(d,p) [S19], respectively.

Figures S9-S11 show the optimized geometries for the  $[\text{Rh}^{\text{III}}(\text{OEP})(\text{Cl})]$  complex found using the VASP program package. The basis set was a projector-augmented-wave (PAW) [S23]. The results shown in Figs. S9, S10, and S11 were obtained by pure-DFT [S2], DFT-D2 [S24], and DFT-D3 [S25] methods, respectively. The exchange-correlational functional is PBE.

As shown in Figs. S8-S11, it is confirmed that the geometry of the  $[\text{Rh}^{\text{III}}(\text{OEP})(\text{Cl})]$  complex was not affected by the atom-centered (Fig. S8) and plane-wave (Figs. S9-S11) basis sets. In addition, the results were not affected by the DFT method: hybrid-DFT (Fig. S8), pure-DFT (Fig. S9), DFT-D2 (Fig. S10), and DFT-D3 (Fig.S11).

In the main text, we argued that the LUMO of  $[\text{Rh}^{\text{III}}(\text{OEP})(\text{Cl})]$  will be important for the interactions of  $[\text{Rh}^{\text{III}}(\text{OEP})(\text{Cl})]$  and graphite during CO electro-oxidation. Then, we checked the LUMOs by hybrid-DFT/SDD (for Rh), 6-31G(d) (for C), and 6-31+G(d,p) (for others) and DFT-D2/PAW methods. The VESTA [S26] and Advance/PHASE programs were used for visualization of calculated results. Figure S12 shows the results, and it was found that the LUMOs are similar one-electron wavefunctions.

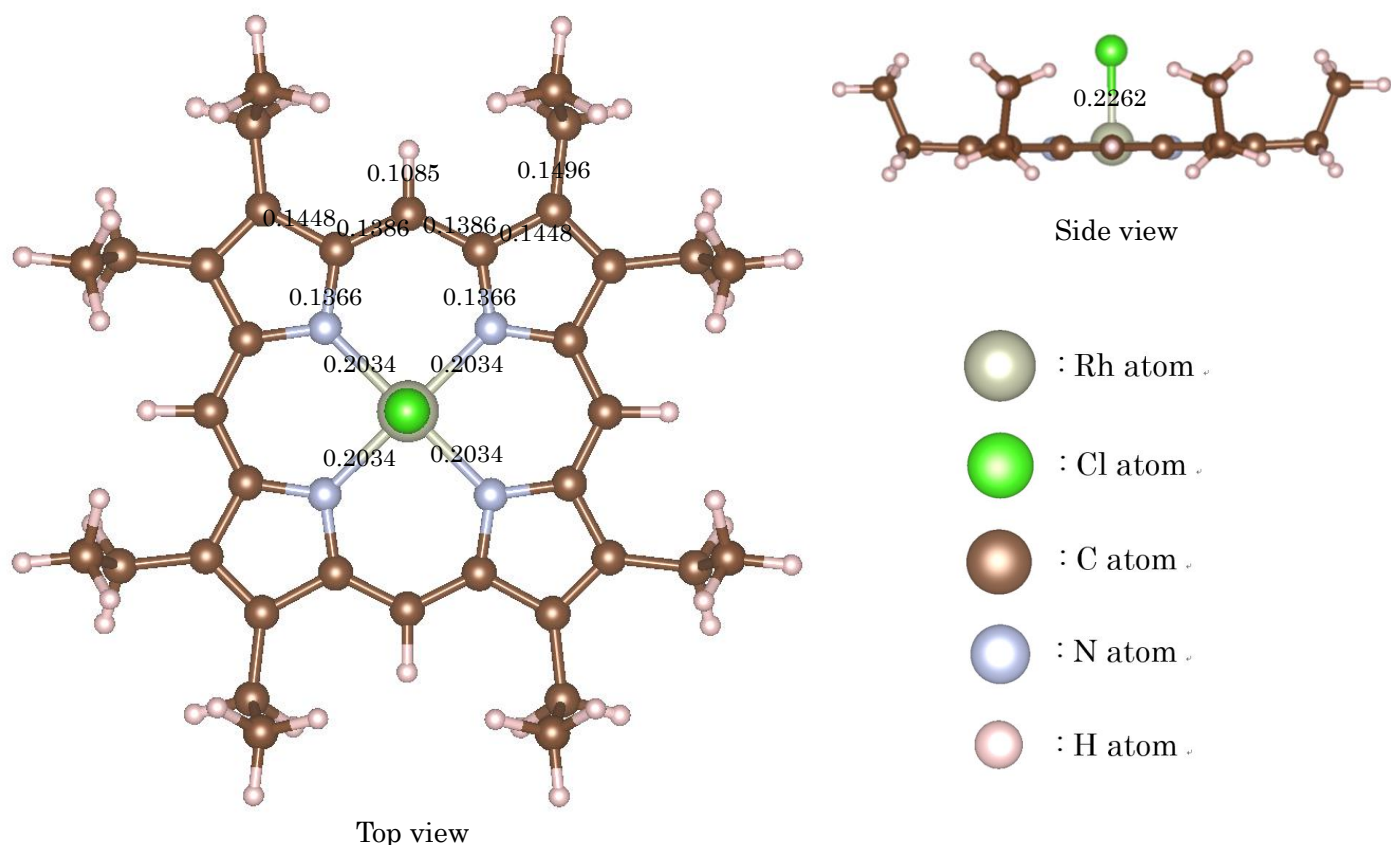

Fig. S8 The optimized geometry of  $[\text{Rh}^{\text{III}}(\text{OEP})(\text{Cl})]$  by PBE0/SDD (for Rh), 6-31G(d) (for C), and 6-31+G(d,p) (for others). The unit of length is nm.

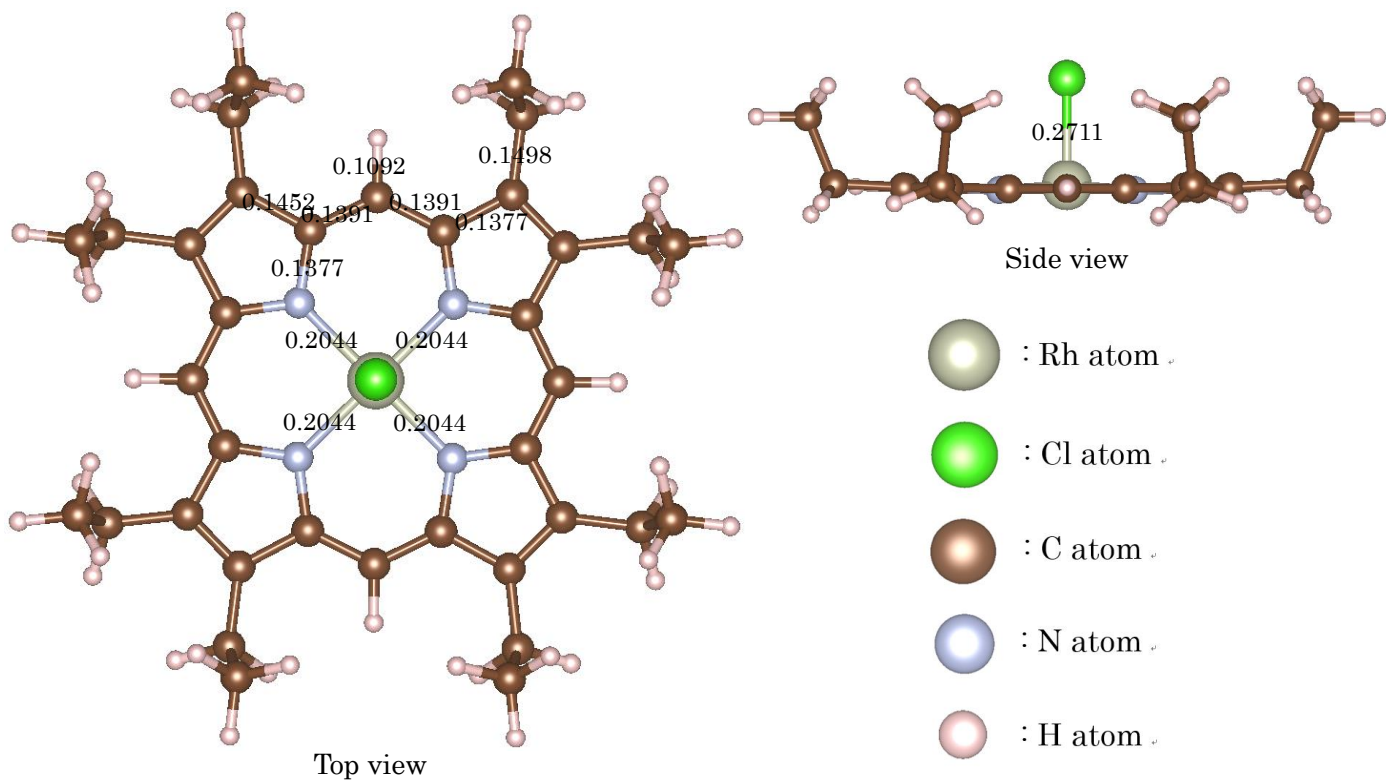

Fig. S9 The optimized geometry of  $[\text{Rh}^{\text{III}}(\text{OEP})(\text{Cl})]$  by PBE/PAW. The unit of length is nm.

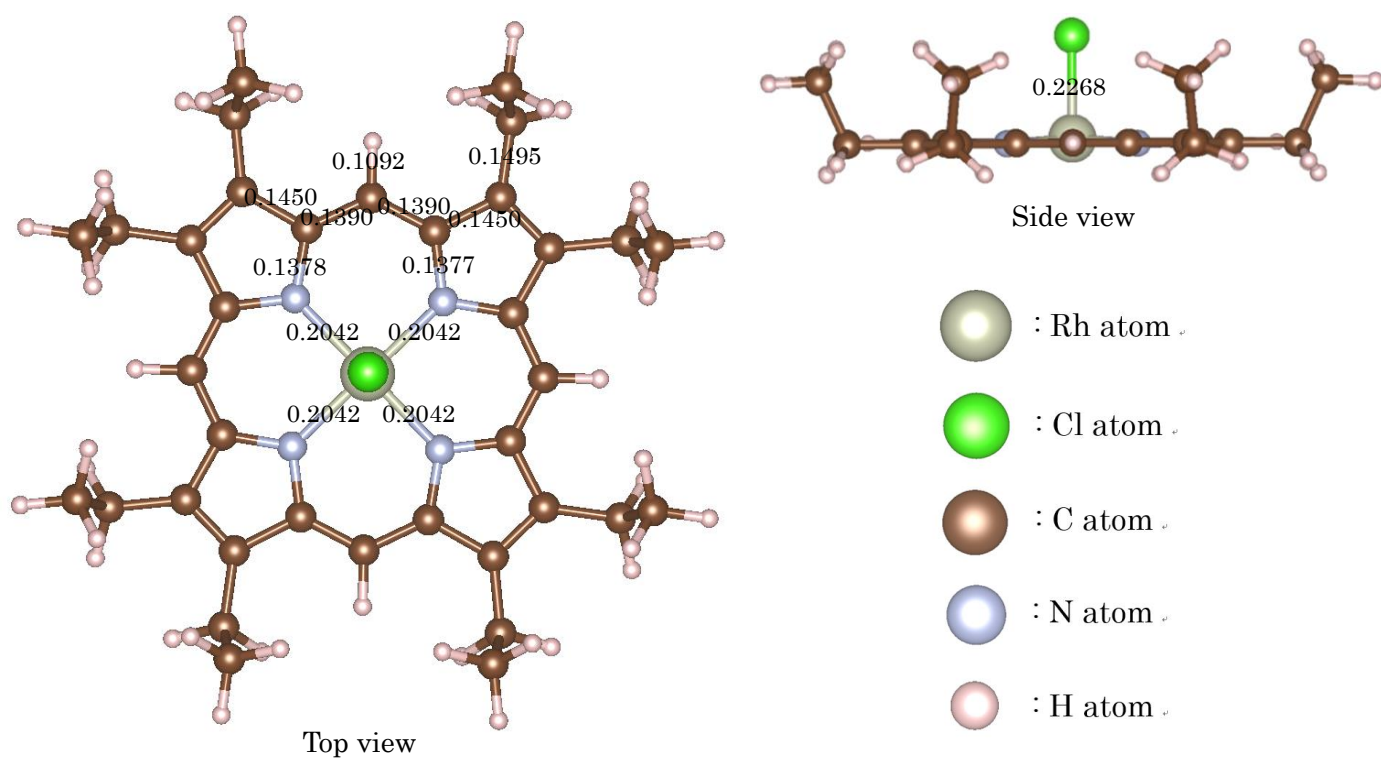

Fig. S10 The optimized geometry of  $[\text{Rh}^{\text{III}}(\text{OEP})(\text{Cl})]$  by PBE-D2/PAW. The unit of length is nm.

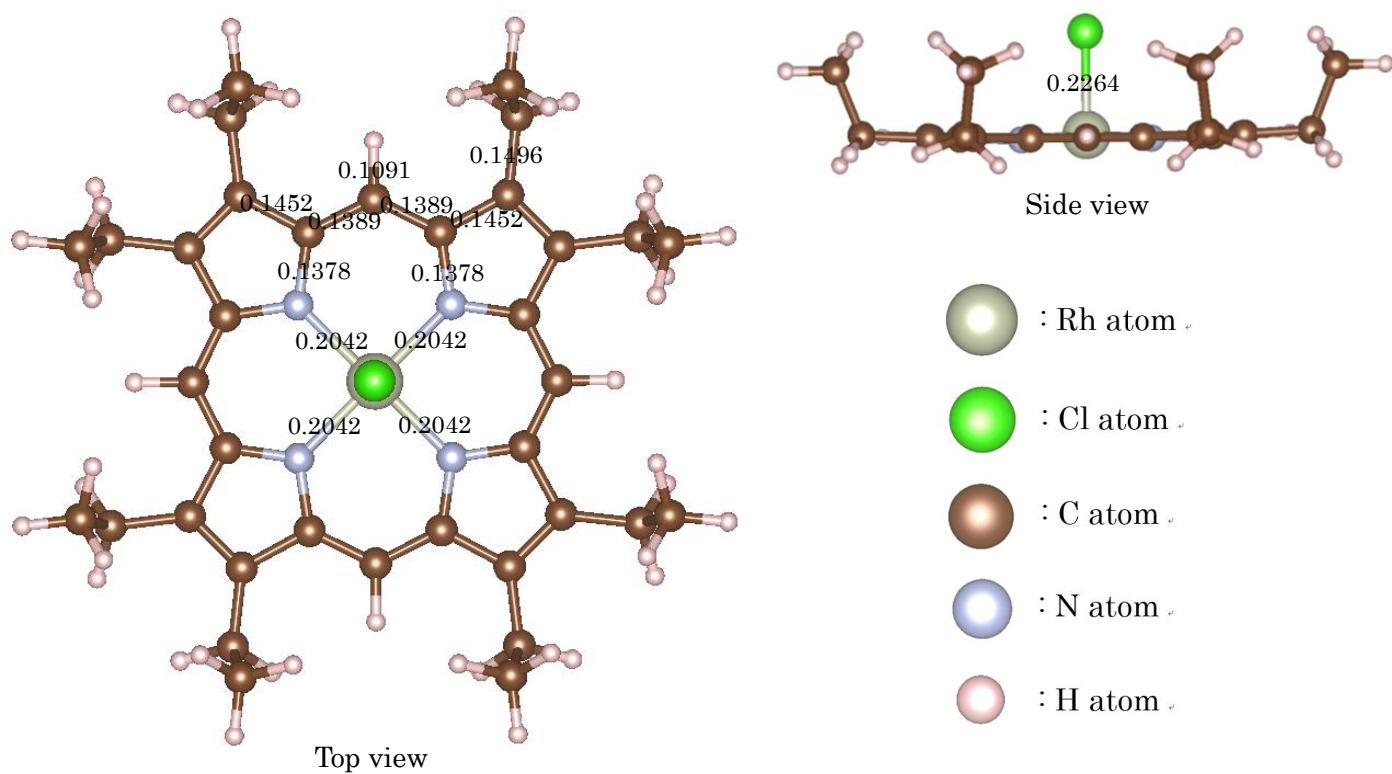

Fig. S11 The optimized geometry of [Rh<sup>III</sup>(OEP)(Cl)] by PBE-D3/PAW. The unit of length is nm.

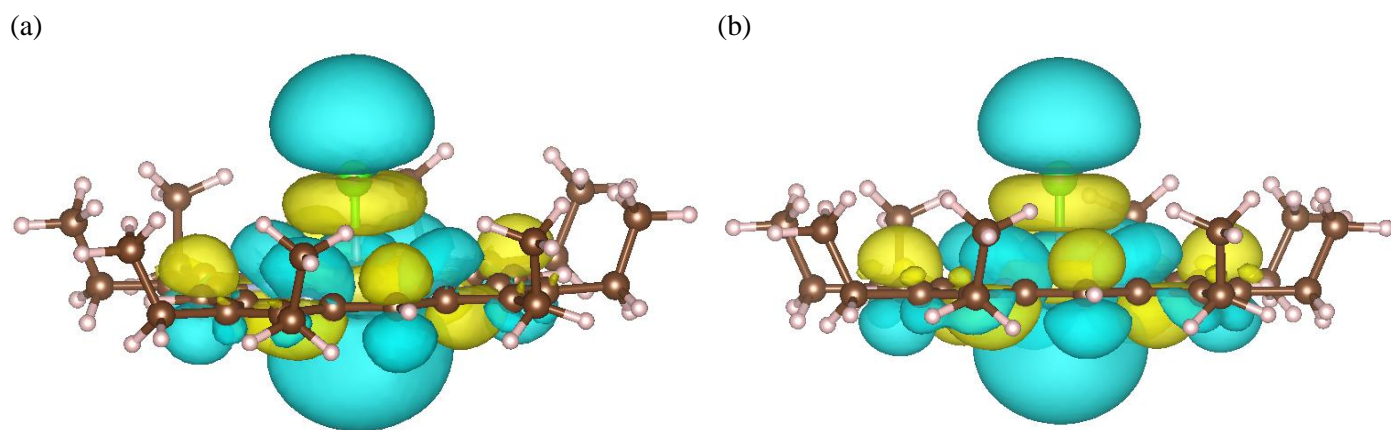

Fig. S12 The LUMOs of [Rh<sup>III</sup>(OEP)(Cl)] calculated by (a) hybrid-DFT/SDD (for Rh), 6-31G(d) (for C), and 6-31+G(d,p) (for others), and (b) DFT-D2/PAW methods.



## Results for the adsorption of [Rh<sup>III</sup>(OEP)(Cl)] onto a two-layer graphite slab model

To investigate the effect of the number of layers of a graphite slab model on the results of [Rh<sup>III</sup>(OEP)(Cl)] adsorbed onto a graphite basal surface calculated by DFT-D2 method [S24] with PBE exchange-correlation functional [S4], the most stable structure of the [Rh<sup>III</sup>(OEP)(Cl)] adsorbed onto a two-layer graphite slab model was calculated. The distance between graphite sheets was set to 3.55 Å and the position of C atoms in graphite was kept fixed during geometry optimization for mimicking the bulk structure. The VASP [S22] program package was used for DFT calculations, and the VESTA [S26] program was used for visualization of calculation results.

The most stable structure of [Rh<sup>III</sup>(OEP)(Cl)]/two-layer graphite is shown in Fig. S13, which also shows the geometry variations around the Rh<sup>III</sup> center ( $\Delta d_2$ : Rh–Cl distance;  $\Delta d_3$ : Rh–N distance; and  $\Delta A$ : N–Rh–N angle), the distance between [Rh<sup>III</sup>(OEP)(Cl)] and graphite ( $d_1$ ), adsorption energy ( $E_{\text{ads}}$ ), chemical interaction energy ( $E_{\text{chem}}^{\text{int}}$ ), such as for interactions involving orbital overlap and charge transfer, and the physical interaction energy ( $E_{\text{phys}}^{\text{int}}$ ), such as London forces (dispersion forces).  $E_{\text{chem}}^{\text{int}}$  and  $E_{\text{phys}}^{\text{int}}$  were estimated by equations (3) and (4) reported in the main text. Negative values correspond to stabilization. The results obtained for the [Rh<sup>III</sup>(OEP)(Cl)]/two-layer graphite system are very similar to those obtained for [Rh<sup>III</sup>(OEP)(Cl)]/single-layer graphite.

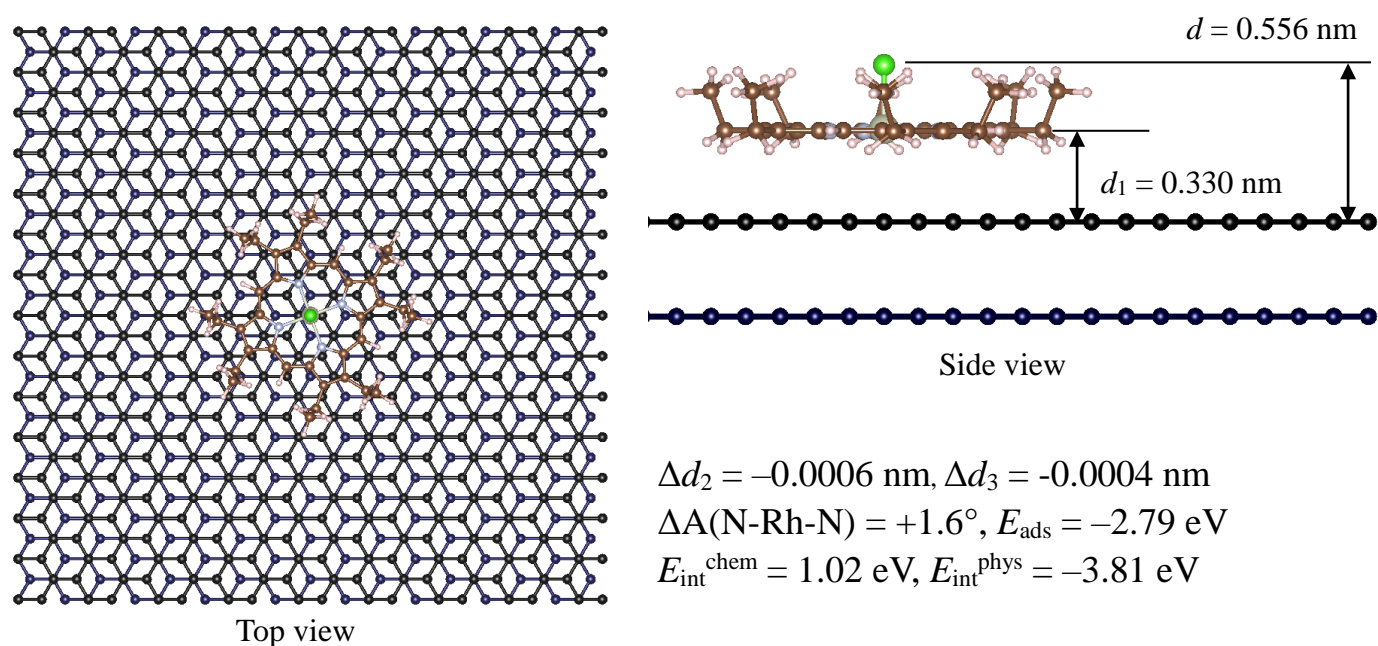

Fig. S13. Most stable structure of [Rh<sup>III</sup>(OEP)(Cl)]/two-layer graphite model including the geometry variations around Rh<sup>III</sup> ( $\Delta d_2$ : Rh–Cl distance;  $\Delta d_3$ : Rh–N distance; and  $\Delta A$ : N–Rh–N angle), the distance between [Rh<sup>III</sup>(OEP)(Cl)] and graphite ( $d_1$ ), adsorption energy ( $E_{\text{ads}}$ ), chemical interaction energy ( $E_{\text{chem}}^{\text{int}}$ ), and physical interaction energy ( $E_{\text{phys}}^{\text{int}}$ ).  $E_{\text{chem}}^{\text{int}}$  and  $E_{\text{phys}}^{\text{int}}$  were estimated by equations (3) and (4) reported in the main text.

## Results for the [Rh<sup>III</sup>(OEP)(Cl)]/graphite system obtained by DFT-D3 method

DFT-D3 method [S25] is an improved method of DFT-D2 [S24], the method is more suitable than DFT-D2 in general. Although it is difficult that all structures are re-calculated by DFT-D3, we re-calculated the most stable structure of [Rh<sup>III</sup>(OEP)(Cl)]/graphite system. The calculation result was summarized in Figure S14, and the result is same as that by DFT-D2, which is shown and discussed in main text.

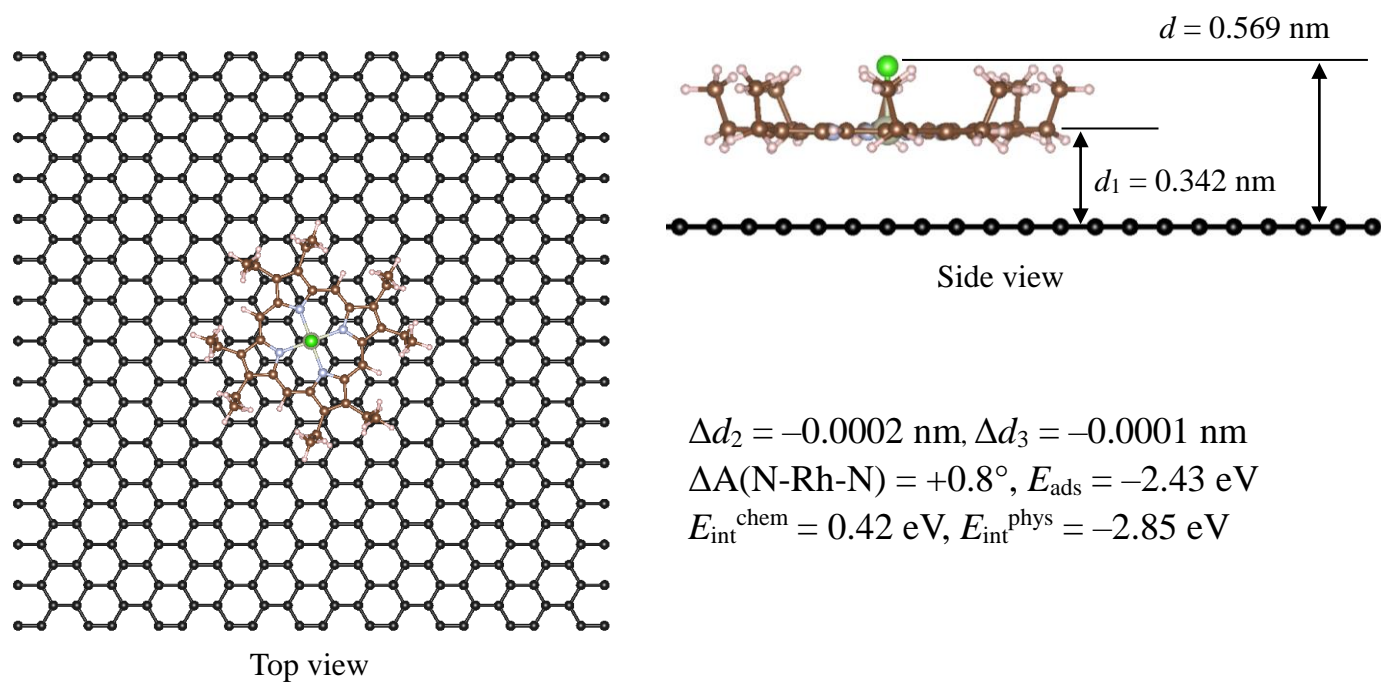

Fig. S14. Most stable structure of [Rh<sup>III</sup>(OEP)(Cl)]/graphite model calculated by DFT-D3 method including the geometry variations around Rh<sup>III</sup> ( $\Delta d_2$ : Rh–Cl distance;  $\Delta d_3$ : Rh–N distance; and  $\Delta A$ : N–Rh–N angle), the distance between [Rh<sup>III</sup>(OEP)(Cl)] and graphite ( $d_1$ ), adsorption energy ( $E_{\text{ads}}$ ), chemical interaction energy ( $E_{\text{int}}^{\text{chem}}$ ), and physical interaction energy ( $E_{\text{int}}^{\text{phys}}$ ).  $E_{\text{int}}^{\text{chem}}$  and  $E_{\text{int}}^{\text{phys}}$  were estimated by equations (3) and (4) reported in the main text.

## Results for the adsorption energies of the $[\text{Rh}^{\text{III}}(\text{OEP})(\text{Cl})]$ /graphite basal surface system

In the main text of the paper, we have shown only part of the results for the adsorption energies ( $E_{\text{ads}}$ ) estimated by pure-DFT (GGA-PBE) and DFT-D (PBE-D2) methods. Here, we report all the results of  $E_{\text{ads}}$  for the calculated structures. In Figs. S15-S17, the results obtained by pure-DFT, while in Figs. S18-S20, those obtained by DFT-D, are reported. Using pure-DFT, we cannot obtain any negative value of  $E_{\text{ads}}$ , whereas, using the DFT-D method, we can obtain  $E_{\text{ads}}$  with negative values. However, even by using DFT-D, the value of  $E_{\text{ads}}$  becomes positive when the  $d_1$  parameter (distance between the porphyrin ring and graphite basal surface) falls below 0.295 nm.

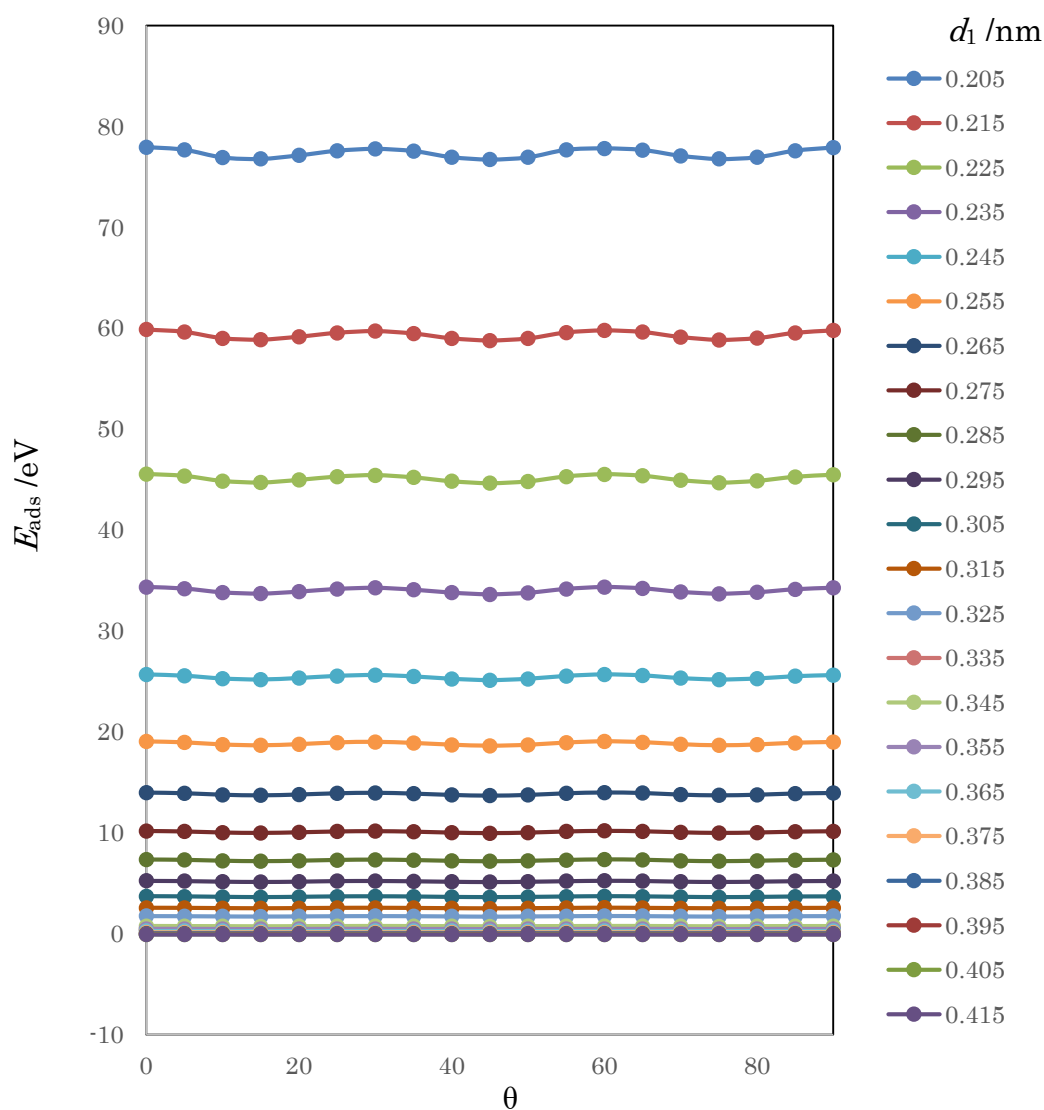

Fig. S15. Results of  $E_{\text{ads}}$  for on-top site adsorptions of  $[\text{Rh}^{\text{III}}(\text{OEP})(\text{Cl})]$  (the model shown in Fig. 5(b) in the main text) estimated by the pure-DFT (GGA-PBE) method.

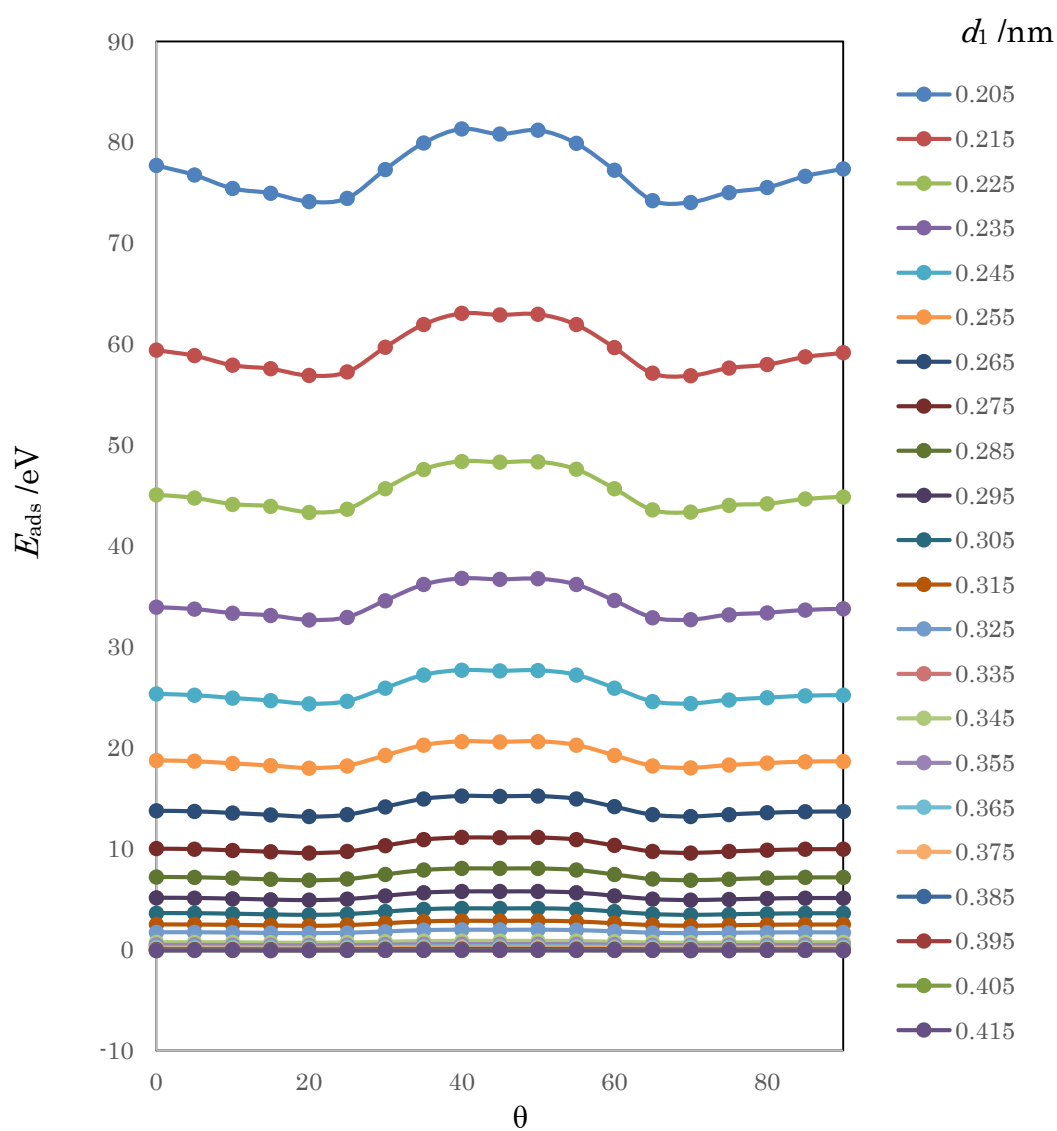

Fig. S16. Results of  $E_{\text{ads}}$  for bridge site adsorptions of  $[\text{Rh}^{\text{III}}(\text{OEP})(\text{Cl})]$  (model shown in Fig. 5(c) in the main text) estimated by the pure-DFT (GGA-PBE) method.

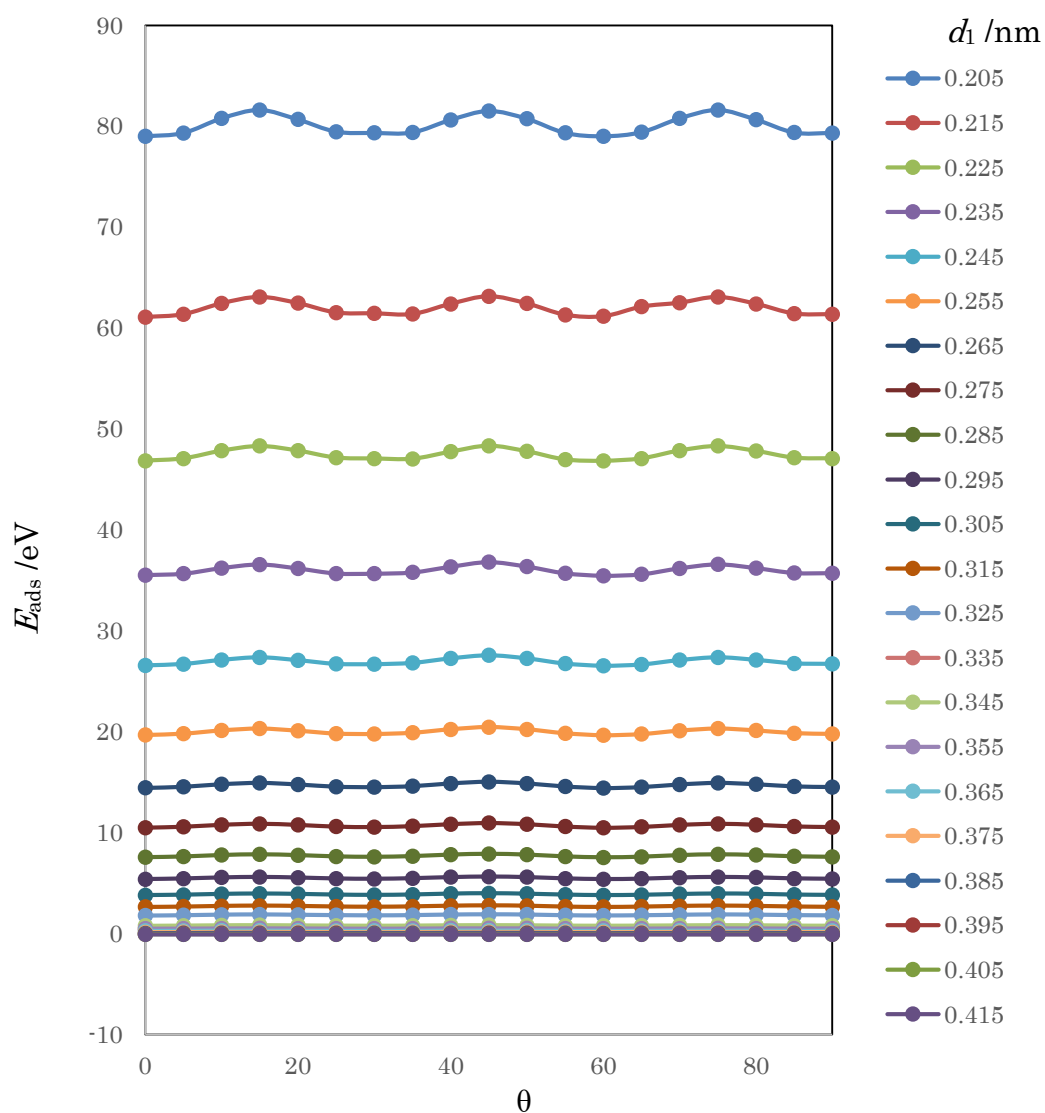

Fig. S17. Results of  $E_{\text{ads}}$  for hollow site adsorptions of  $[\text{Rh}^{\text{III}}(\text{OEP})(\text{Cl})]$  (model shown in Fig. 5(d) in the main text) estimated by the pure-DFT (GGA-PBE) method.

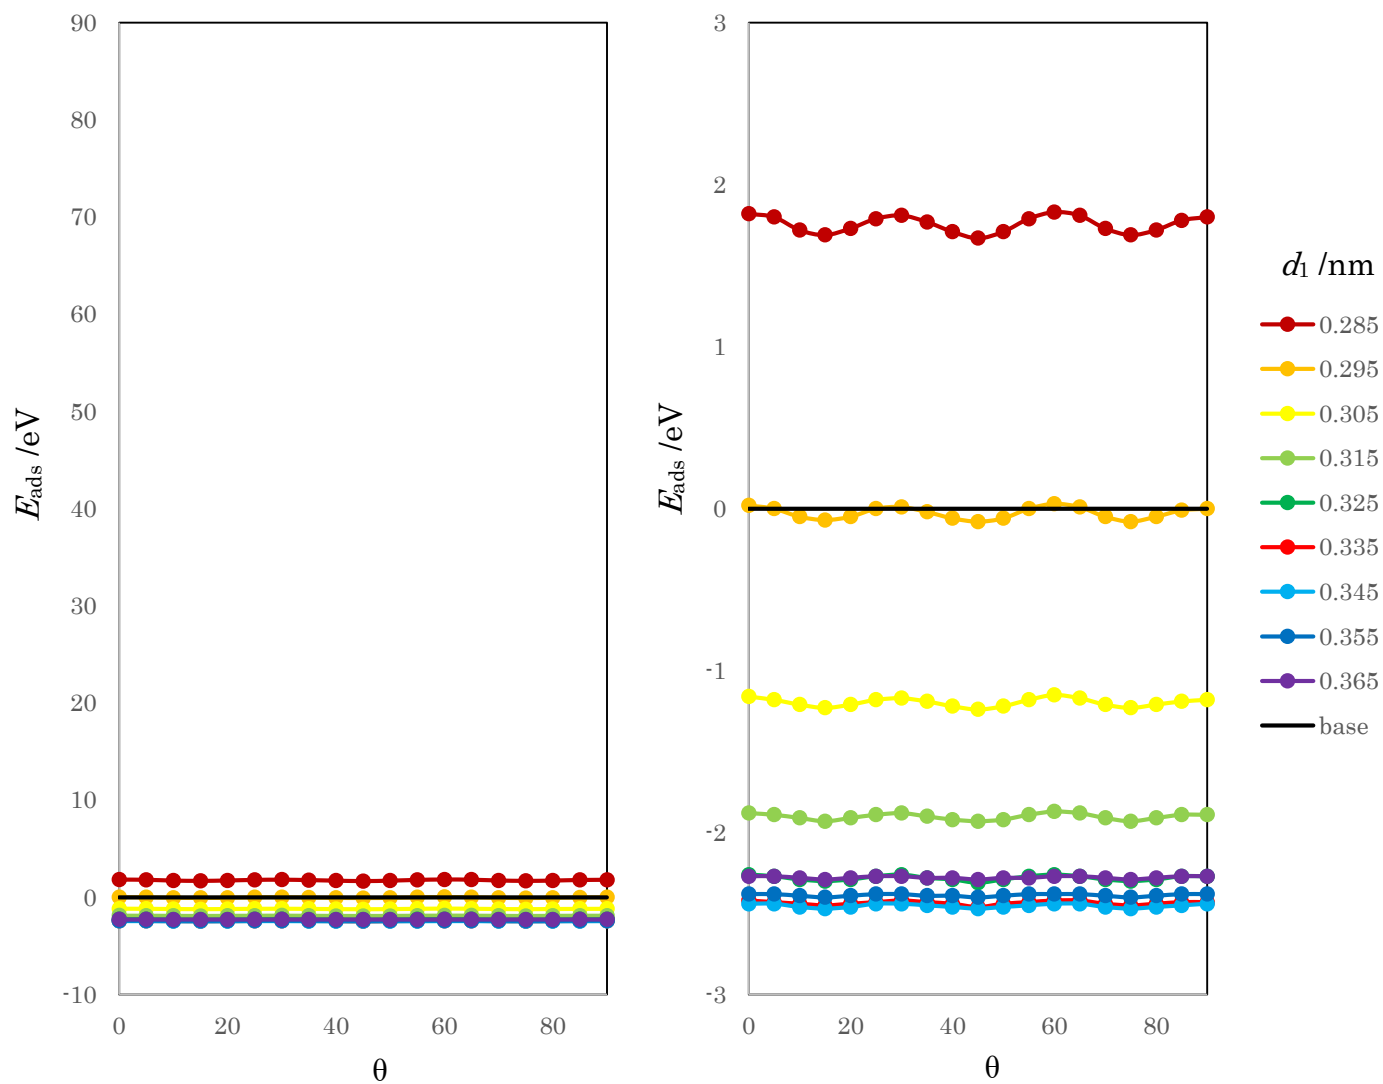

Fig. S18. Results of  $E_{\text{ads}}$  for on-top site adsorptions of  $[\text{Rh}^{\text{III}}(\text{OEP})(\text{Cl})]$  (model shown in Fig. 5(b) in the main text) estimated by DFT-D (PBE-D2) method. The left panel has the same magnification of  $E_{\text{ads}}$  as Figs. S9-S11, while the right panel shows an enlarged view.

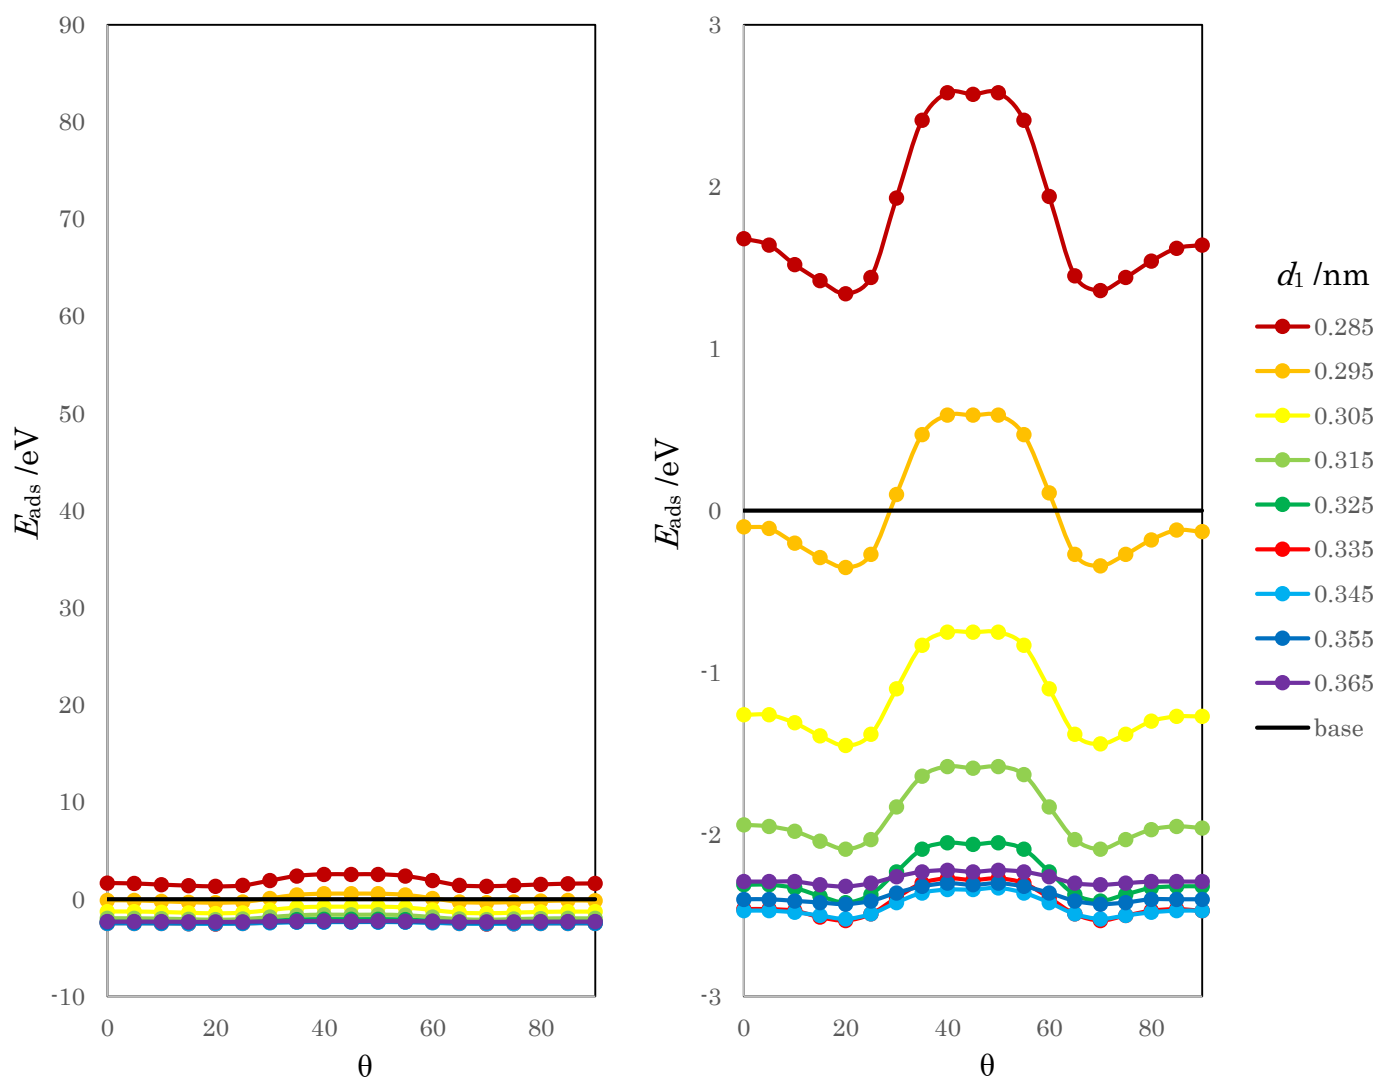

Fig. S19. Results of  $E_{\text{ads}}$  for bridge site adsorptions of  $[\text{Rh}^{\text{III}}(\text{OEP})(\text{Cl})]$  (model shown in Fig. 5(c) in the main text) estimated by the DFT-D (PBE-D2) method. The left panel has the same magnification of  $E_{\text{ads}}$  as Figs. S9-S11, while the right panel shows an enlarged view.

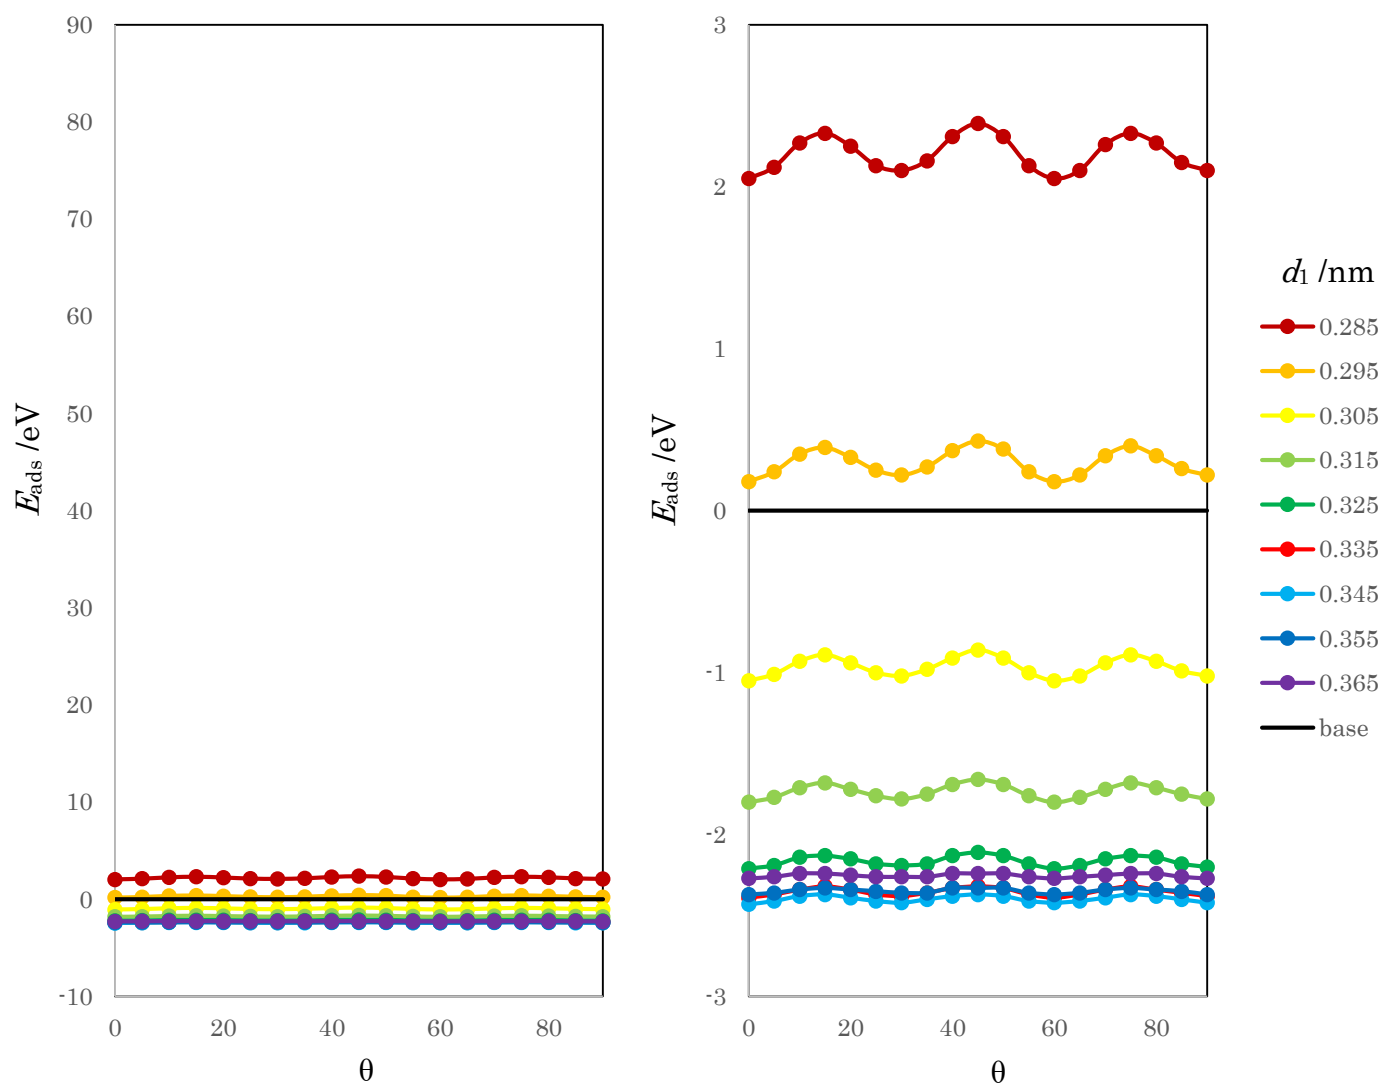

Fig. S20. Results of  $E_{\text{ads}}$  of bridge site adsorptions of  $[\text{Rh}^{\text{III}}(\text{OEP})(\text{Cl})]$  (model shown in Fig. 5(d) in the main text) estimated by the DFT-D (PBE-D2) method. The left panel has the same magnification of  $E_{\text{ads}}$  as Figs. S9-S11, while the right panel shows an enlarged view.



## Results for height profiles of molecular layers on HOPG observed by AFM

To ensure that the molecular layers of  $[\text{Rh}^{\text{III}}(\text{OEP})(\text{Cl})]$  on HOPG observed in Fig. 9 in the main text are the same as those reported in our recent work [S27], we investigated the height profile of the molecular layers such as the monolayer sheet and aggregated layer. As shown in Fig. S21, the height profile of the monolayer and aggregated layer are 0.44 nm and 1.21 nm, respectively. These results are consistent with our recent results [S27].

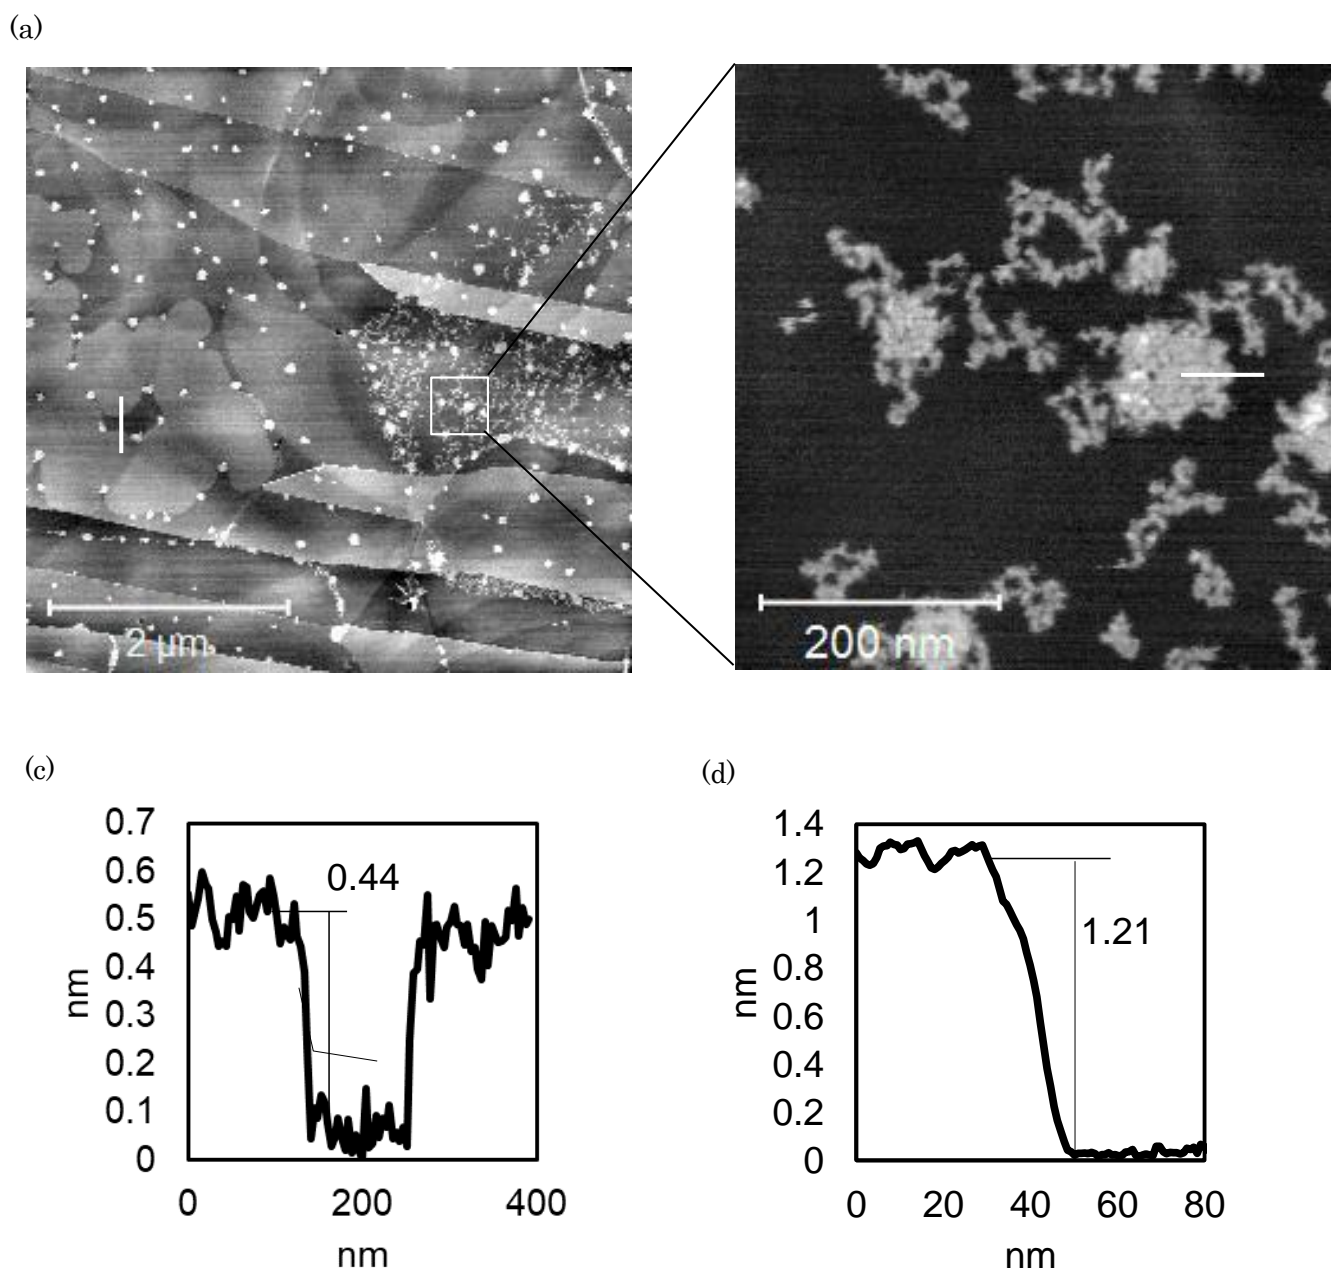

Fig. S21. (a) AFM image of  $[\text{Rh}^{\text{III}}(\text{OEP})(\text{Cl})]/\text{HOPG}$  (identical to Fig. 9(a) in the main text), (b) enlarged AFM image of the square area in (a), (c) height profile along the white line drawn in (a) that corresponds to the height profile of a monolayer sheet of  $[\text{Rh}^{\text{III}}(\text{OEP})(\text{Cl})]$ , and (d) height profile along the white line drawn in (b) that corresponds to the height profile of an aggregated layer of  $[\text{Rh}^{\text{III}}(\text{OEP})(\text{Cl})]$ .

## Results for the frontier orbitals of the $[\text{Rh}^{\text{III}}(\text{OEP})(\text{Cl})]/\text{graphite}$ basal surface system

Here, we show the results obtained for the frontier orbitals of the most stable  $[\text{Rh}^{\text{III}}(\text{OEP})(\text{Cl})]/\text{graphite}$  basal surface model estimated by the DFT-D method. For calculations, the Advance/PHASE program package was used.

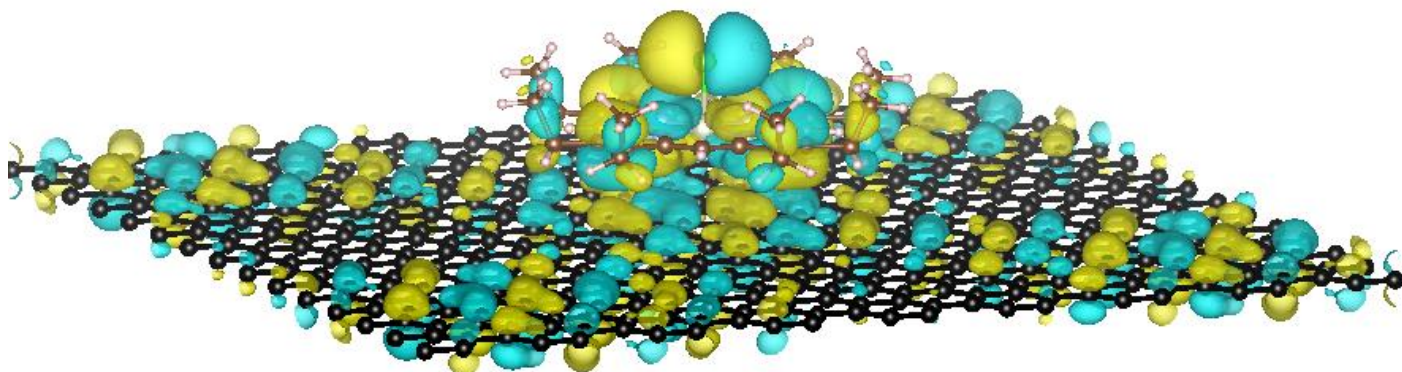

Fig. S22. HOMO-12 of the most stable  $[\text{Rh}^{\text{III}}(\text{OEP})(\text{Cl})]/\text{graphite}$  system. The isosurface value is 0.01 a.u..

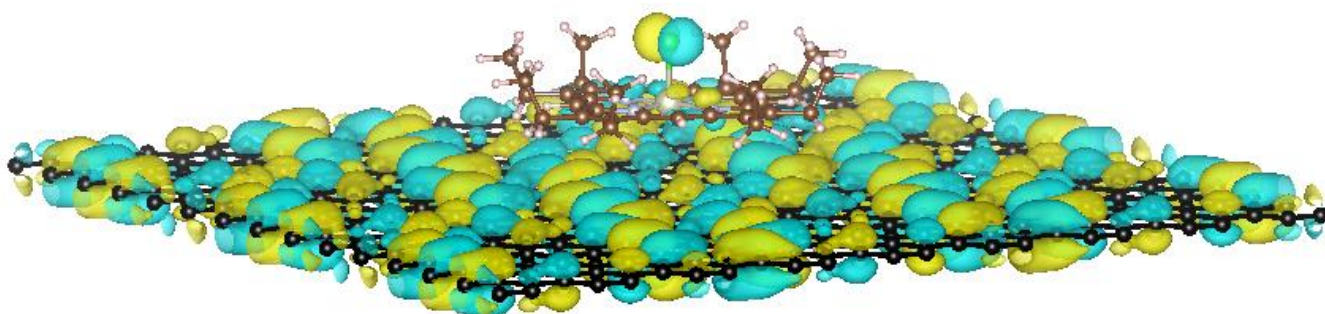

Fig. S23. HOMO-11 of the most stable  $[\text{Rh}^{\text{III}}(\text{OEP})(\text{Cl})]/\text{graphite}$  system. The isosurface value is 0.01 a.u..

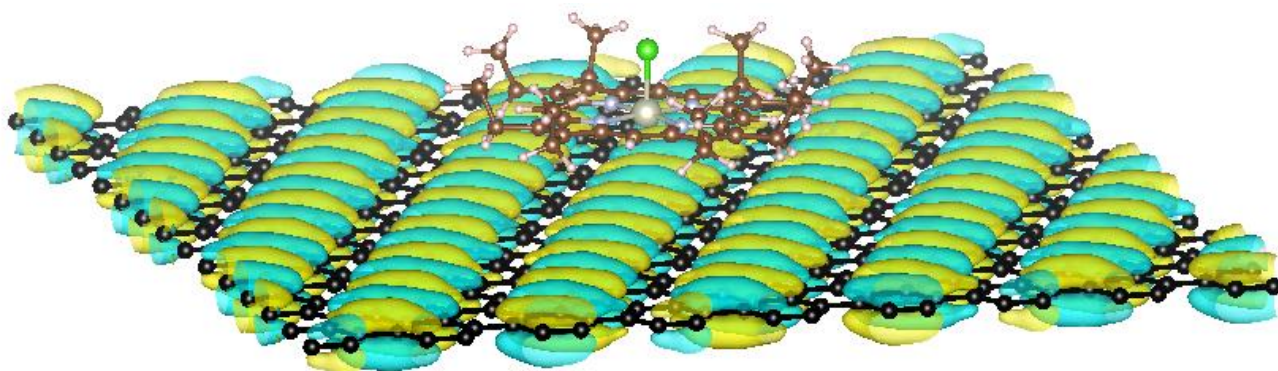

Fig. S24. HOMO-10 of the most stable  $[\text{Rh}^{\text{III}}(\text{OEP})(\text{Cl})]/\text{graphite}$  system. The isosurface value is 0.01 a.u..

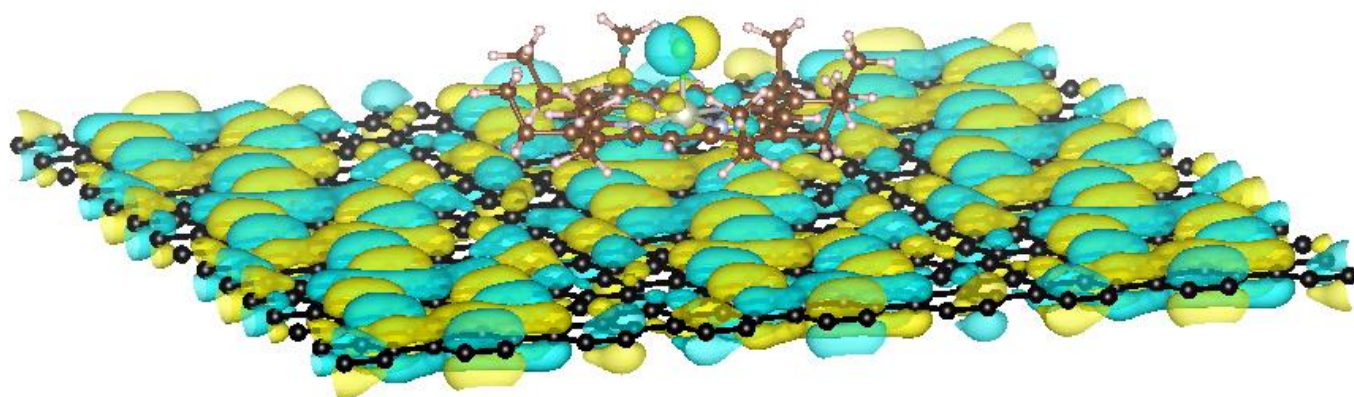

Fig. S25. HOMO-9 of the most stable  $[\text{Rh}^{\text{III}}(\text{OEP})(\text{Cl})]/\text{graphite}$  system. The isosurface value is 0.01 a.u..

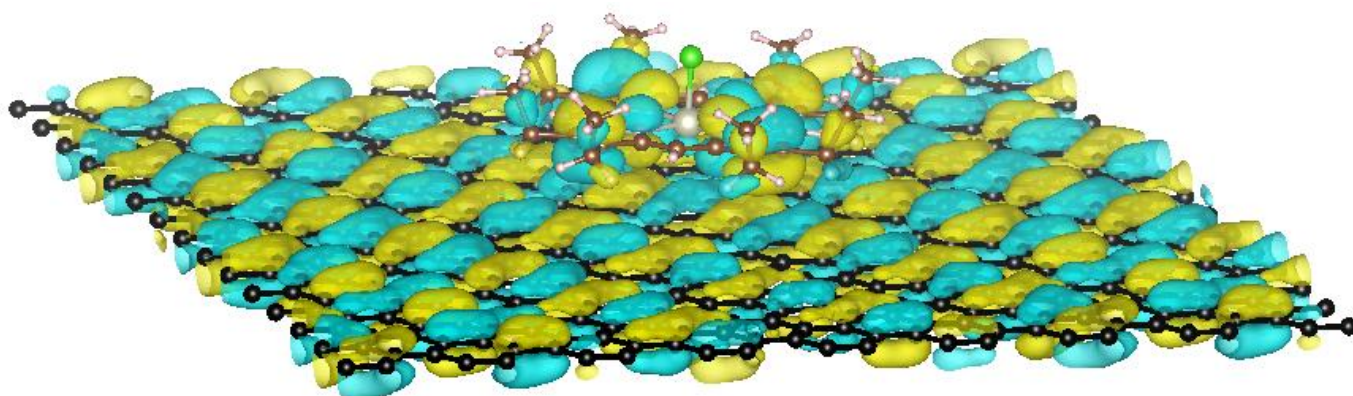

Fig. S26. HOMO-8 of the most stable  $[\text{Rh}^{\text{III}}(\text{OEP})(\text{Cl})]/\text{graphite}$  system. The isosurface value is 0.01 a.u..

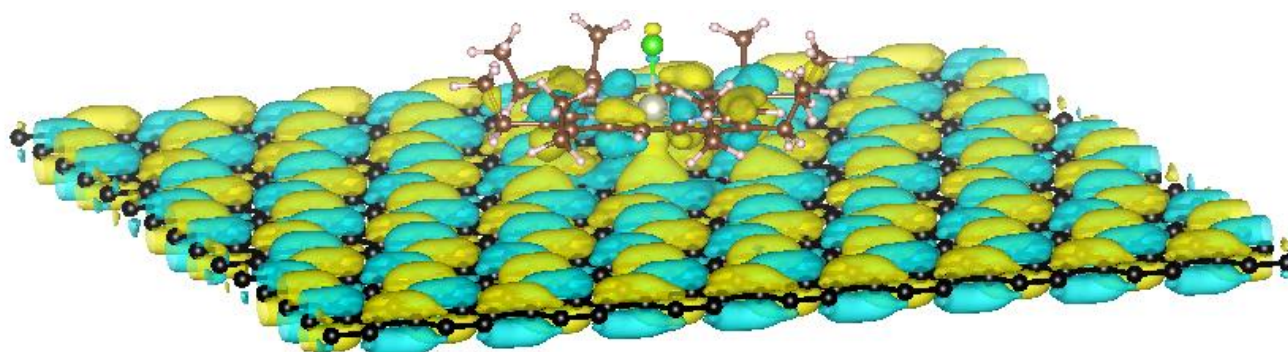

Fig. S27. HOMO-7 of the most stable  $[\text{Rh}^{\text{III}}(\text{OEP})(\text{Cl})]/\text{graphite}$  system. The isosurface value is 0.01 a.u..

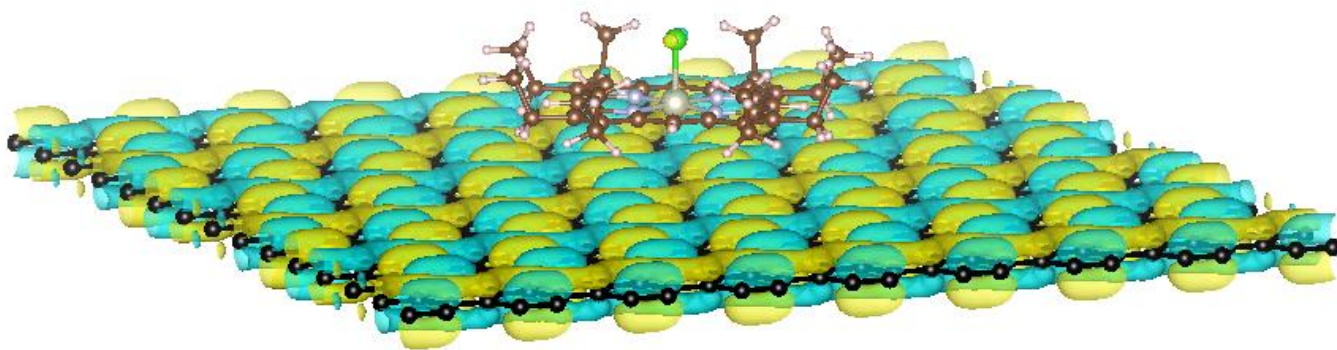

Fig. S28. HOMO-6 of the most stable  $[\text{Rh}^{\text{III}}(\text{OEP})(\text{Cl})]/\text{graphite}$  system. The isosurface value is 0.01 a.u..

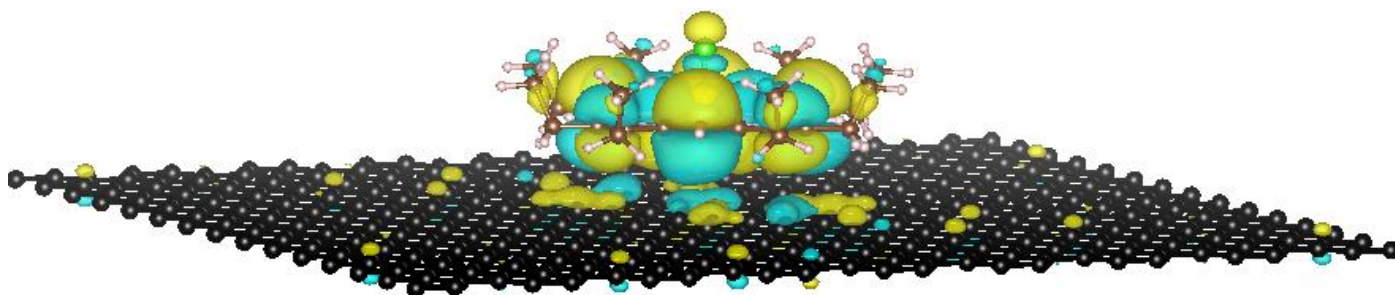

Fig. S29. HOMO-5 of the most stable  $[\text{Rh}^{\text{III}}(\text{OEP})(\text{Cl})]/\text{graphite}$  system. The isosurface value is 0.01 a.u..

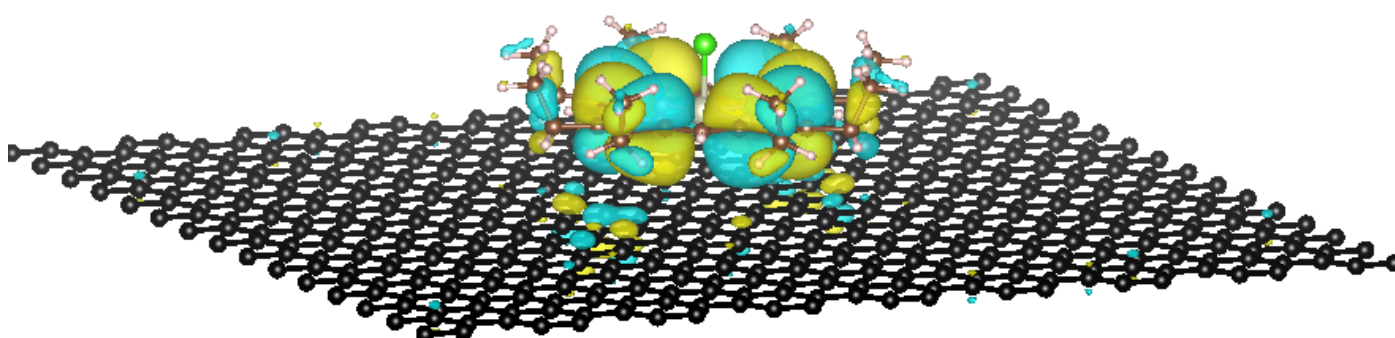

Fig. S30. HOMO-4 of the most stable  $[\text{Rh}^{\text{III}}(\text{OEP})(\text{Cl})]/\text{graphite}$  system. The isosurface value is 0.01 a.u..

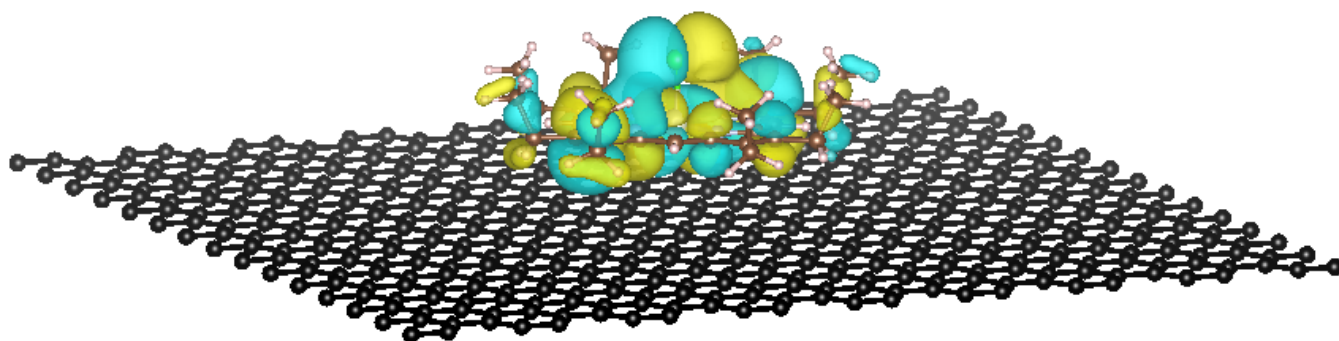

Fig. S31. HOMO-3 of the most stable  $[\text{Rh}^{\text{III}}(\text{OEP})(\text{Cl})]$ /graphite system. The isosurface value is 0.01 a.u..

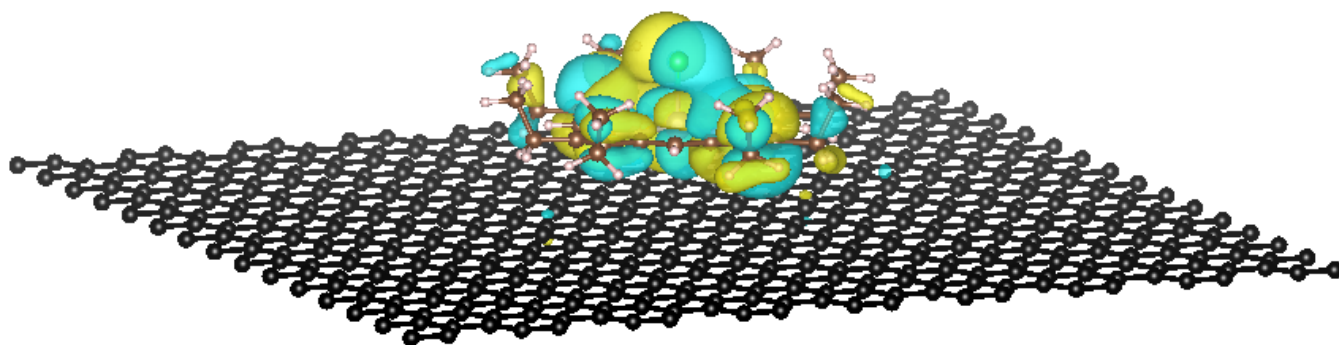

Fig. S32. HOMO-2 of the most stable  $[\text{Rh}^{\text{III}}(\text{OEP})(\text{Cl})]$ /graphite system. The isosurface value is 0.01 a.u..

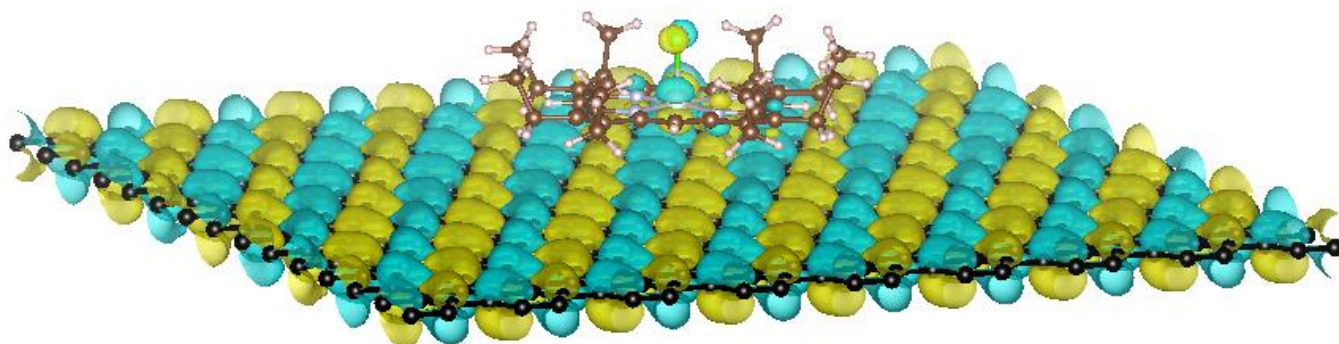

Fig. S33. HOMO-1 of the most stable  $[\text{Rh}^{\text{III}}(\text{OEP})(\text{Cl})]$ /graphite system. The isosurface value is 0.01 a.u..

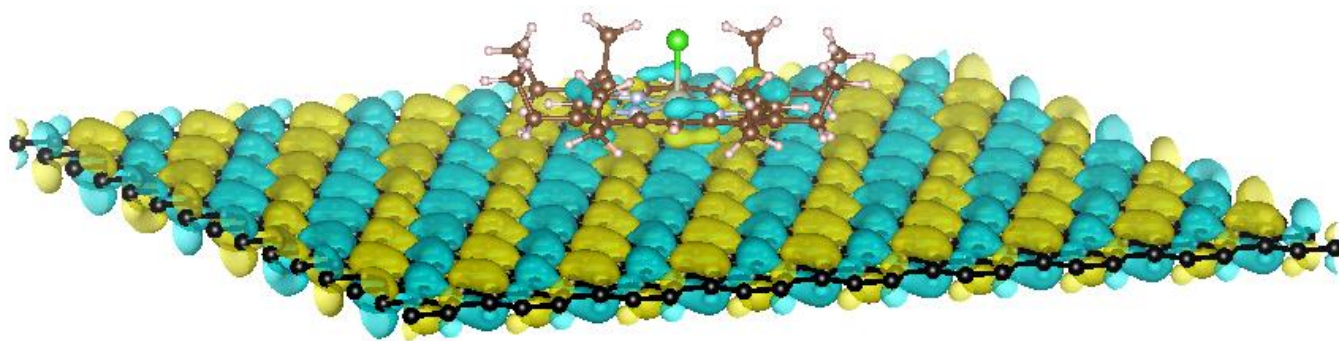

Fig. S34. HOMO of the most stable  $[\text{Rh}^{\text{III}}(\text{OEP})(\text{Cl})]/\text{graphite}$  system. The isosurface value is 0.01 a.u..

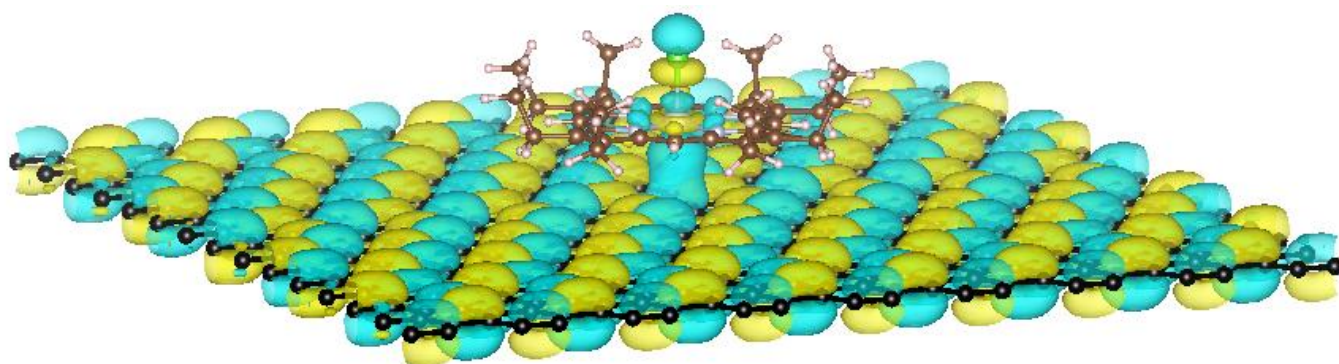

Fig. S35. LUMO of the most stable  $[\text{Rh}^{\text{III}}(\text{OEP})(\text{Cl})]/\text{graphite}$  system. The isosurface value is 0.01 a.u..

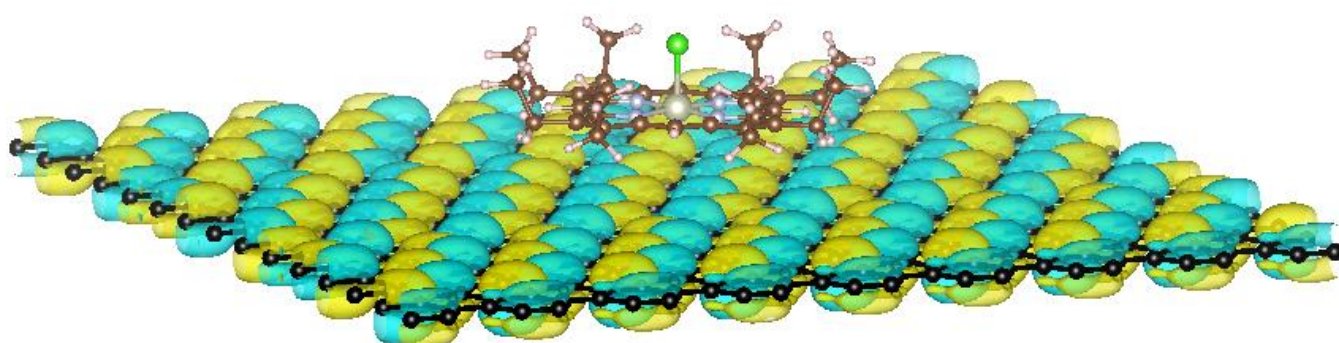

Fig. S36. LUMO+1 of the most stable  $[\text{Rh}^{\text{III}}(\text{OEP})(\text{Cl})]/\text{graphite}$  system. The isosurface value is 0.01 a.u..

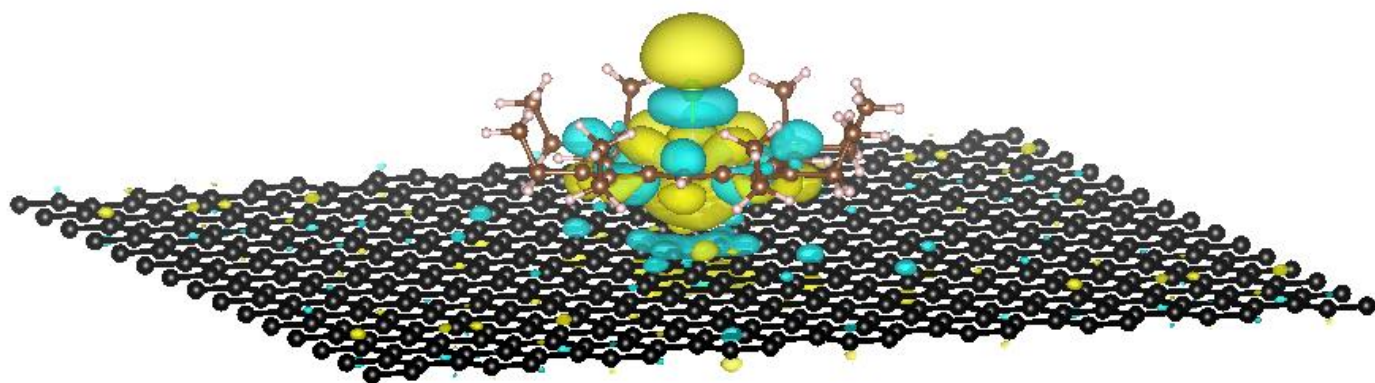

Fig. S37. LUMO+2 of the most stable  $[\text{Rh}^{\text{III}}(\text{OEP})(\text{Cl})]/\text{graphite}$  system. The isosurface value is 0.01 a.u..

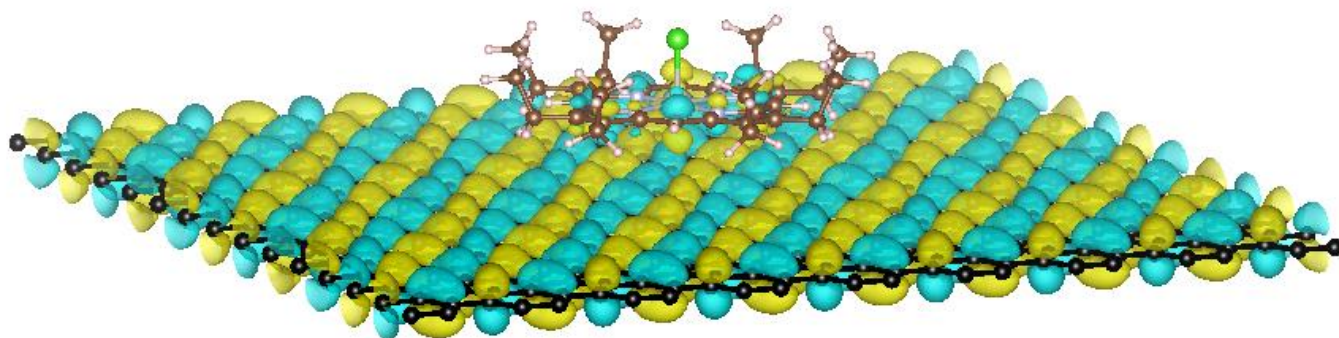

Fig. S38. LUMO+3 of the most stable  $[\text{Rh}^{\text{III}}(\text{OEP})(\text{Cl})]/\text{graphite}$  system. The isosurface value is 0.01 a.u..

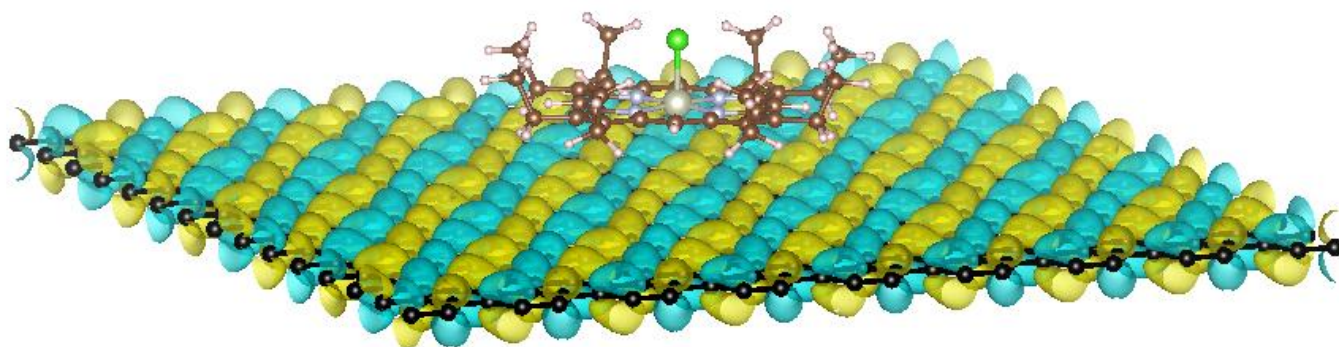

Fig. S39. LUMO+4 of the most stable  $[\text{Rh}^{\text{III}}(\text{OEP})(\text{Cl})]/\text{graphite}$  system. The isosurface value is 0.01 a.u..

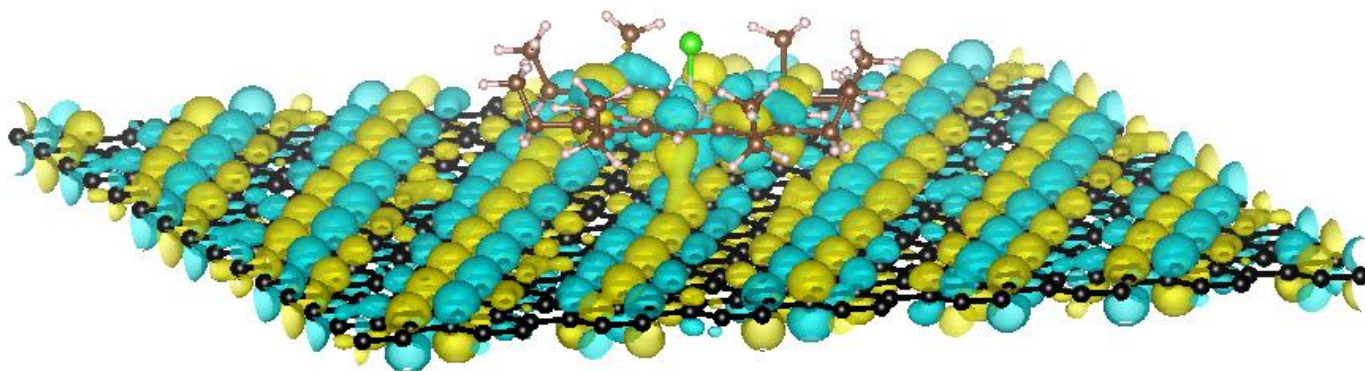

Fig. S40. LUMO+5 of the most stable  $[\text{Rh}^{\text{III}}(\text{OEP})(\text{Cl})]/\text{graphite}$  system. The isosurface value is 0.01 a.u..

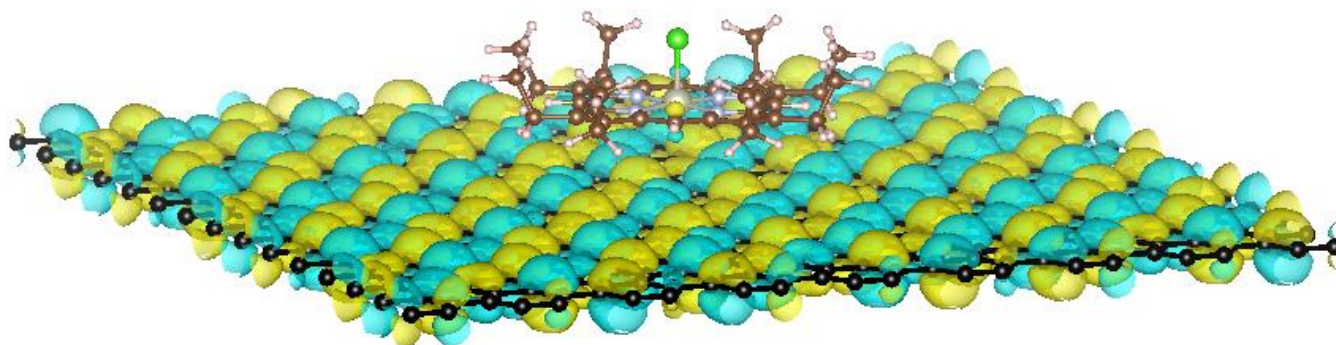

Fig. S41. LUMO+6 of the most stable  $[\text{Rh}^{\text{III}}(\text{OEP})(\text{Cl})]/\text{graphite}$  system. The isosurface value is 0.01 a.u..

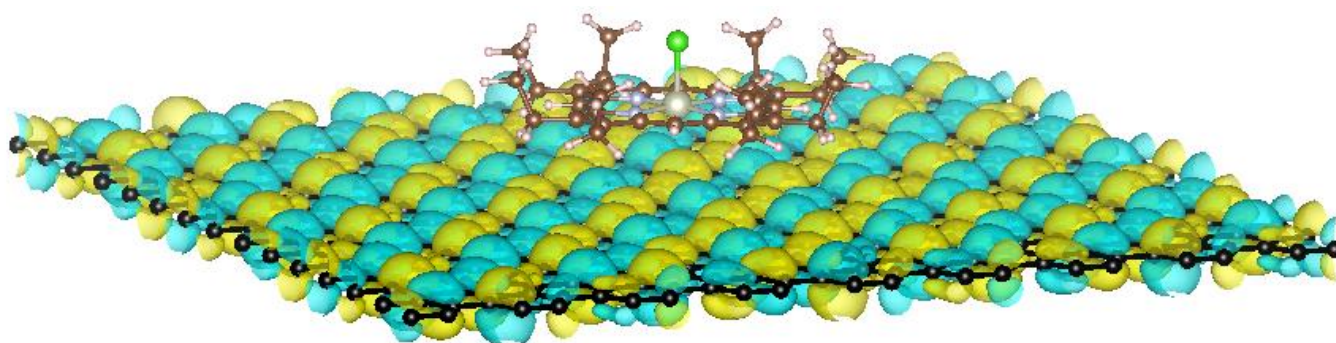

Fig. S42. LUMO+7 of the most stable  $[\text{Rh}^{\text{III}}(\text{OEP})(\text{Cl})]/\text{graphite}$  system. The isosurface value is 0.01 a.u..



## References for supplementary material

[S1] a) K. Kowalski, P. Piecuch, *Mol. Phys.*, 102 (2004) 2425; b) H. Paulsen, V. Schunemann, and J.A. Wolny, *Eur. J. Inorg. Chem.*, (2013) 628; c) A. Szabo and N.S. Oatlund, *Modern Quantum Chemistry*, Dover (1996); d) C. Møller and M.S. Plesset, *Phys. Rev.*, 46 (1934) 0618; e) R.J. Bartlett and G.D. Purvis III, *Int. J. Quantum Chem.*, 14 (1978) 561; f) J. A. Pople, M. Head-Gordon, and K. Raghavachari, *J. Chem. Phys.*, 87 (1987) 5968; g) H. Nakatsuji and K. Hirao, *J. Chem. Phys.*, 68 (1978) 2053; h) K. Hallberg, *Adv. Phys.*, 55 (2006) 477

[S2] W. Kohn and L.J. Sham, *Phys. Rev.*, 140 (1965) A1133

[S3] a) A.D. Becke, *Phys. Rev. A*, 38 (1988) 3098; b) C. Lee, W. Yang, and R.G. Parr, *Phys. Rev. B*, 37 (1988) 785

[S4] a) J.P. Perdew, K. Burke, and M. Ernzerhof, *Phys. Rev. Lett.*, 77 (1996) 3865; b) J.P. Perdew, K. Burke, and M. Ernzerhof, *Phys. Rev. Lett.*, 78 (1997) 1396

[S5] a) A.D. Becke, *J. Chem. Phys.*, 98 (1993) 5648; b) C. Lee, W. Yang, and R.G. Parr, *Phys. Rev. B*, 37, (1988) 785

[S6] a) J.P. Perdew and Y. Wang, *Phys. Rev. B*, 45, 13244; b) A.D. Becke, *Phys. Rev. A*, 38 (1988) 3098

[S7] C. Adamo and V. Barone, *J. Chem. Phys.*, 110 (1999) 6158

[S8] Y. Zhao, N.E. Schultz, and D. G. Truhlar, *J. Chem. Phys.*, 123 (2005) 161103

[S9] Y. Zhao and D. G. Truhlar, *Theor. Chem. Acc.*, 120 (2008) 215

[S10] T. Yanai, D. Tew, and N. Handy, *Chem. Phys. Lett.*, 393 (2004) 51

[S11] a) O.A. Vydrov and G. Scuseria, *J. Chem. Phys.*, 125 (2006) 234109; b) O.A. Vydrov, J. Heyd, A. Krukou, and G. Scuseria, *J. Chem. Phys.*, 125 (2006) 074106; c) O.A. Vydrov, G. Scuseria, and J. P. Perdew, *J. Chem. Phys.*, 126 (2007) 154109

[S12] P. Schwerdfeger, M. Dolg, W.H.E. Schwarz, G.A. Bownaker, and P.D.W. Boyd, *J. Chem. Phys.*, 91 (1989) 1762

[S13] a) P.J. Hay and W.R. Wadt, *J. Chem. Phys.*, 82 (1985) 270; b) W.R. Wadt and P.J. Hay, *J. Chem. Phys.*, 82 (1985) 284; c) P.J. Hay and W.R. Wadt, *J. Chem. Phys.*, 82 (1985) 299

[S14] a) P.J. Hay and W.R. Wadt, *J. Chem. Phys.*, 82 (1985) 270; b) W.R. Wadt and P.J. Hay, *J. Chem. Phys.*, 82

(1985) 284; c) P.J. Hay and W.R. Wadt, *J. Chem. Phys.*, 82 (1985) 299; c) L.E. Roy, P.J. Hay, and R.L. Martin, *J. Chem. Theory Comput.*, 4 (2008) 1029; d) A.W. Ehlers, M. Bohme, S. Dapprich, A. Gobbi, A. Hollwarth, V. Jonas, K.F. Kohler, R. Stegmann, A. Veldkamp, G. Frenking, *Chem. Phys. Lett.*, 208 (1993) 111

[S15] O. M. Roscioni, E. P. F. Lee, and M. Dyke, *J. Comp. Chem.*, 33 (2012) 2049

[S16] J. A. Pople, M. Head-Gordon, and K. Raghavachari, *J. Chem. Phys.*, 87 (1987) 5968

[S17] Japan Chemical Society, *Kagaku-Binran*, Maruzen (1993) *in Japanese*

[S18] Gaussian 09, Rev. A. 02, M. J. Frisch, G. W. Trucks, H. B. Schlegel, G. E. Scuseria, M. A. Robb, J. R. Cheeseman, G. Scalmani, V. Barone, B. Mennucci, G. A. Petersson, H. Nakatsuji, M. Caricato, X. Li, H. P. Hratchian, A. F. Izmaylov, J. Bloino, G. Zheng, J. L. Sonnenberg, M. Hada, M. Ehara, K. Toyota, R. Fukuda, J. Hasegawa, M. Ishida, T. Nakajima, Y. Honda, O. Kitao, H. Nakai, T. Vreven, J. A. Montgomery, Jr., K. N. Kudin, V. N. Staroverov, R. Kobayashi, J. Normand, K. Raghavachari, A. Rendell, J. C. Burant, S. S. Iyengar, J. Tomasi, M. Cossi, N. Rega, J. M. Millam, M. Klene, J. E. Knox, J. B. Cross, V. Bakken, C. Adamo, J. Jaramillo, R. Gomperts, R. E. Stratmann, O. Yazyez, A. J. Austin, R. Cammi, C. Pomelli, J. W. Ochterski, R. L. Martin, K. Morokuma, V. G. Zakrzewski, G. A. Voth, P. Salvador, J. J. Dannenberg, S. Dapprich, A. D. Daniels, O. Farkas, J. B. Foresman, J. V. Ortiz, J. Cioslowski, and D. J. Fox, Gaussian, Inc., Wallingford CT, 2009

[S19] R. Ditchfield, W. J. Hehre, and J. A. Pople, *J. Chem. Phys.*, 54 (1971) 724

[S20] a) T. H. Dunning Jr., *J. Chem. Phys.*, 90 (1989) 1007; b) R. A. Kendall, T. H. Dunning Jr., and R. J. Harrison, *J. Chem. Phys.*, 96 (1992) 6796; c) A.K. Wilson, T. van Mourik, and T.H. Dunning Jr., *J. Mol. Struct. (Theochem)*, 388 (1996) 339

[S21] S. Simon, M. Duran, and J. J. Dannenberg, *J. Chem. Phys.*, 105 (1996) 11024-31.

[S22] a) G. Kresse, J. Hafner, *Phys. Rev. B*, 47 (1993) 558–561; b) G. Kresse, J. Hafner, *Phys. Rev. B*, 49 (1994) 14251–14269; c) G. Kresse, J. Furthmüller, *Comput. Mater. Sci.*, 6 (1996) 15–50; d) G. Kresse, J. Furthmüller, *Phys. Rev. B*, 54 (1996) 11169–11186

[S23] a) P. E. Blöchl, *Phys. Rev. B*, 1994, **50**, 17953; b) G. Kresse, J. Joubert, *Phys. Rev. B*, 1999, **59**, 1758

[S24] a) S. Grimme., *J. Comp. Chem.*, 27 (2006) 1787; b) T. Bucko, J. Hafner, S. Lebègue, and J. G. Ángyán, *J. Phys. Chem. A*, 114 (2010) 11814-11824

[S25] S. Grimme, J. Antony, S. Ehrlich, and S. Krieg, *J. Chem. Phys.*, 2010, 132, 154104

[S26] K. Momma, F. Izumi, *J. Appl. Crystallogr.*, 44 (2011) 1272

[S27] Y. Maeda, K. Tada, and S. Yamazaki, *e-J. Sur. Sci. Nanotech.*, 2018, **16**, 253-256
